# Supplementary material for: Ankyrin-B is a PI3P effector that promotes polarized α5β1-integrin recycling via recruiting RabGAP1L to early endosomes
Source: eLife journal article supplement (doi:10.7554/elife.20417), 2016-10-08
Supplement: supp [file elife-20417-supp-v1.zip]

Archive with 10 entries (10 files):
- elife_poa_e20417_Figure_4_figure_supplement_2.pdf
- elife_poa_e20417_Figure_2_figure_supplement_1.pdf
- elife_poa_e20417_Figure_5_figure_supplement_1.pdf
- elife_poa_e20417_Figure_3_figure_supplement_1.pdf
- elife_poa_e20417_Figure_1_figure_supplement_1.pdf
- elife_poa_e20417_Figure_6_figure_supplement_3.pdf
- elife_poa_e20417_Figure_6_figure_supplement_1.pdf
- elife_poa_e20417_Figure_4_figure_supplement_1.pdf
- elife_poa_e20417_Figure_8_figure_supplement_1.pdf
- elife_poa_e20417_Figure_6_figure_supplement_2.pdf
