# Supplementary figures and images for: Ankyrin-B is a PI3P effector that promotes polarized α5β1-integrin recycling via recruiting RabGAP1L to early endosomes
Source: eLife journal article supplement (doi:10.7554/elife.20417), 2016-10-08

Figure 4—figure supplement 1

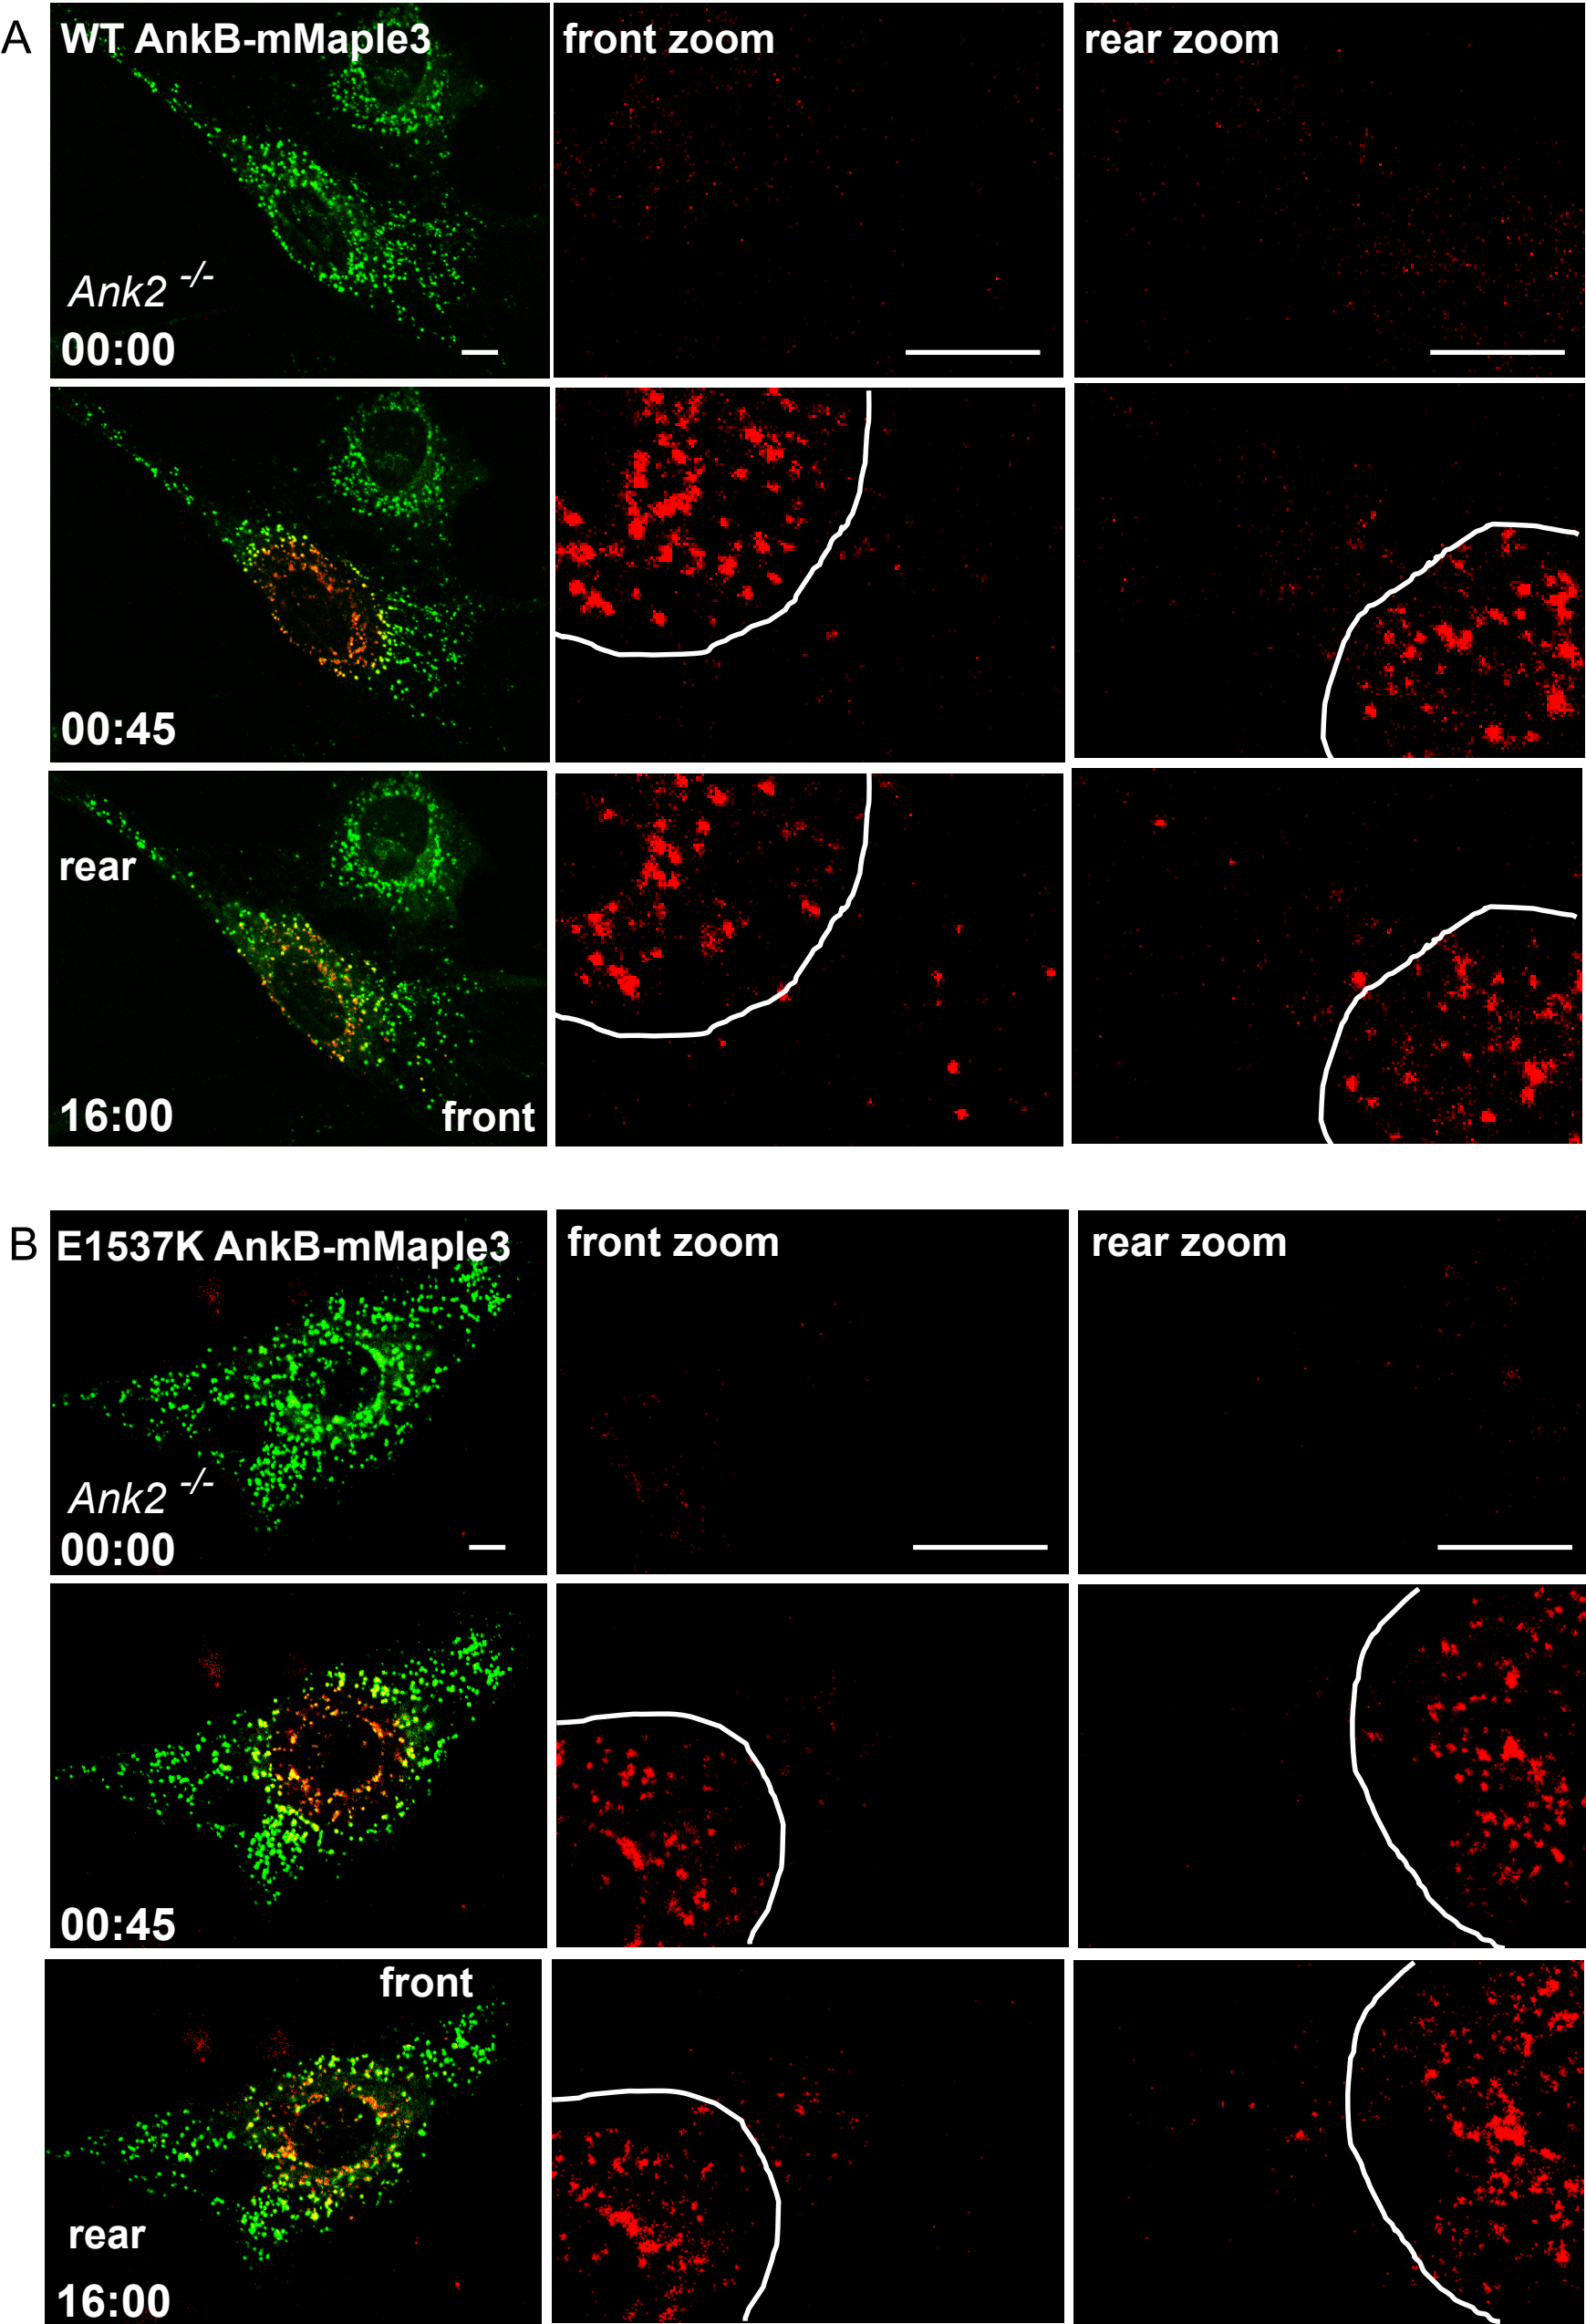

Supplement: supp [file elife-20417-supp-v1.zip]

Figure 6—figure supplement 1

**A**

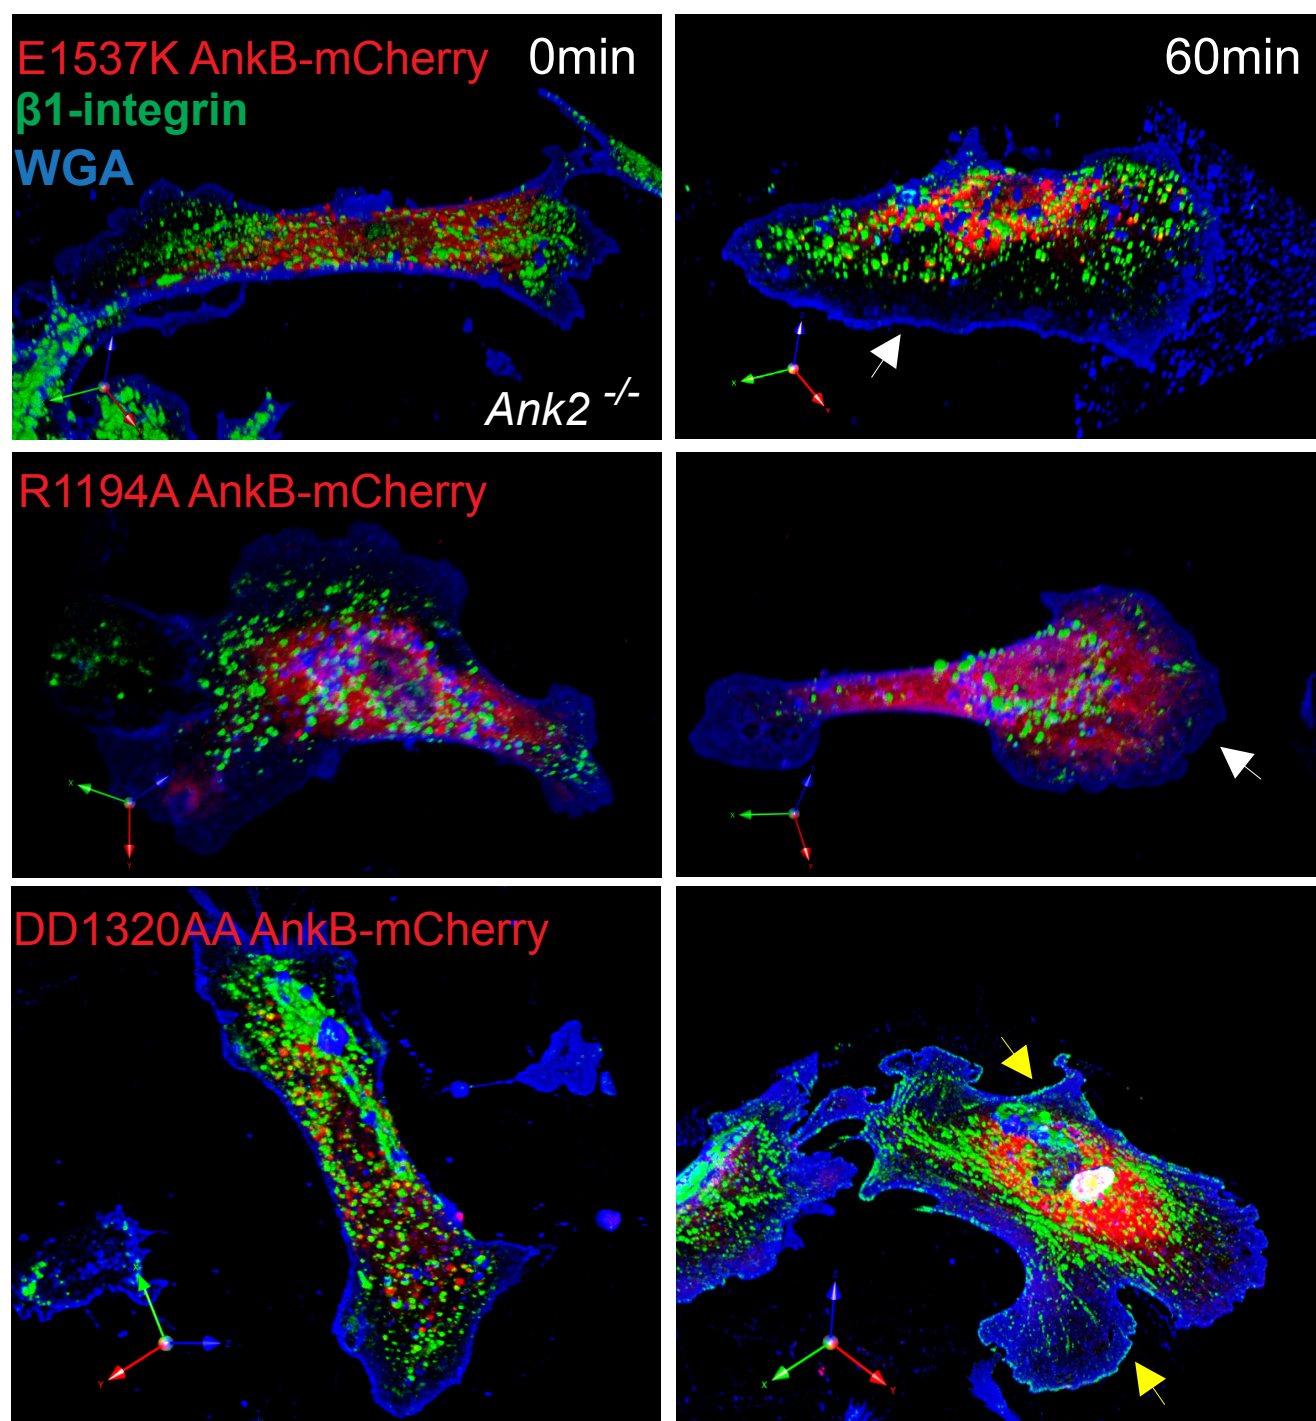

**B**

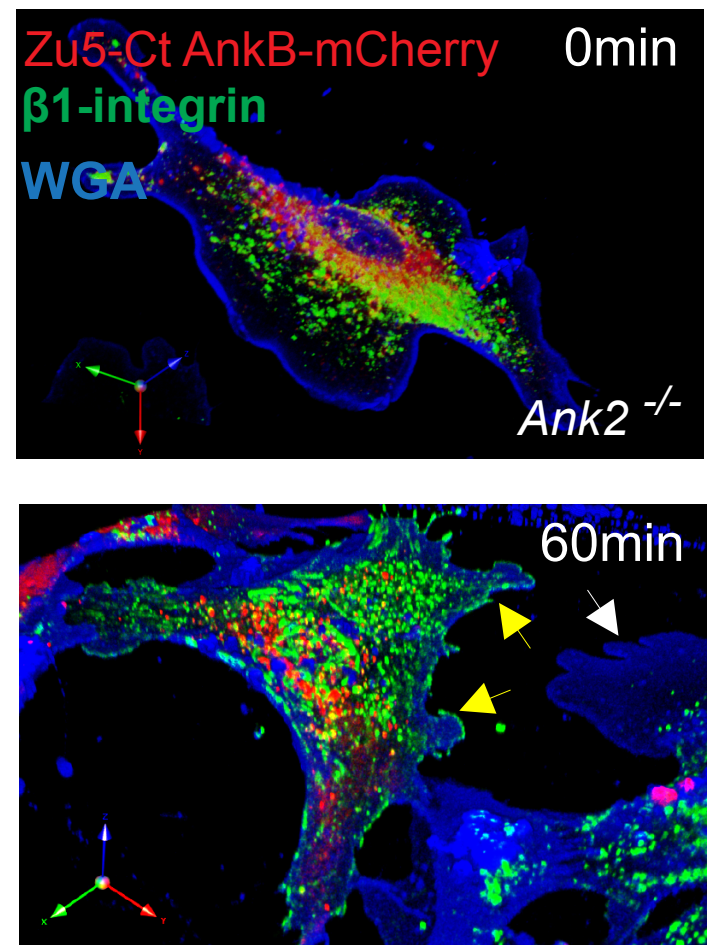

**C**

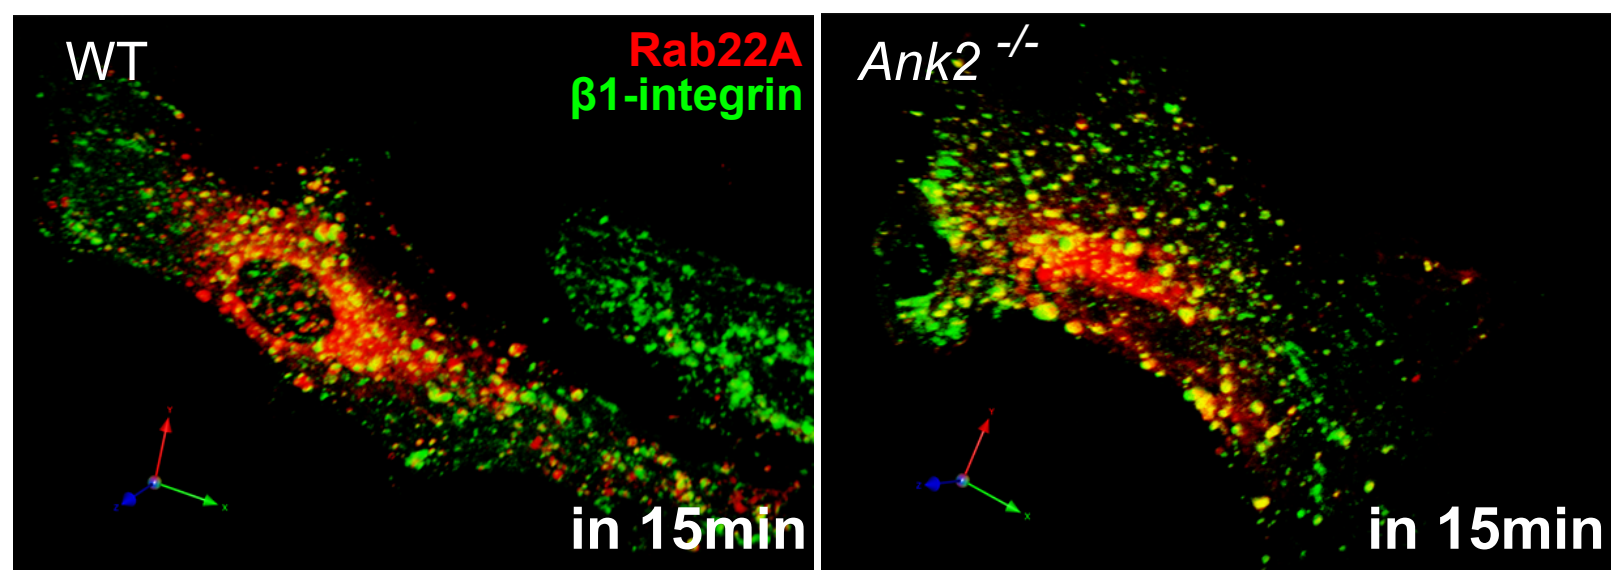

**D Rab22a with β1-integrin**

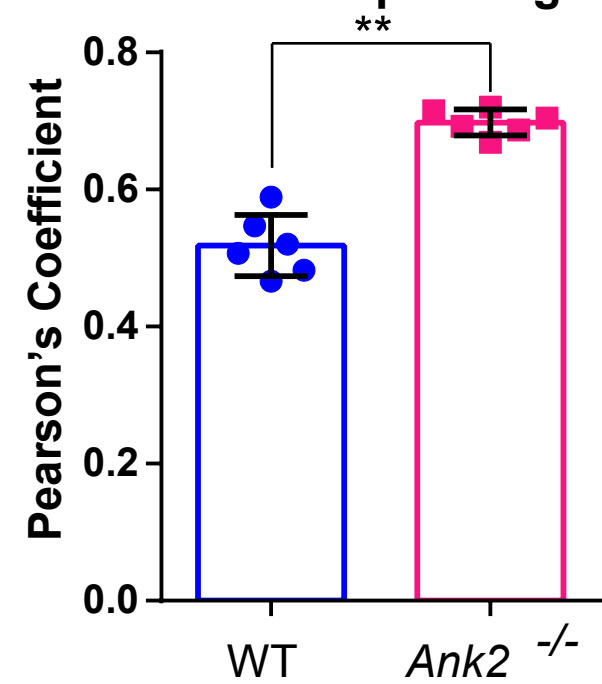

**E**

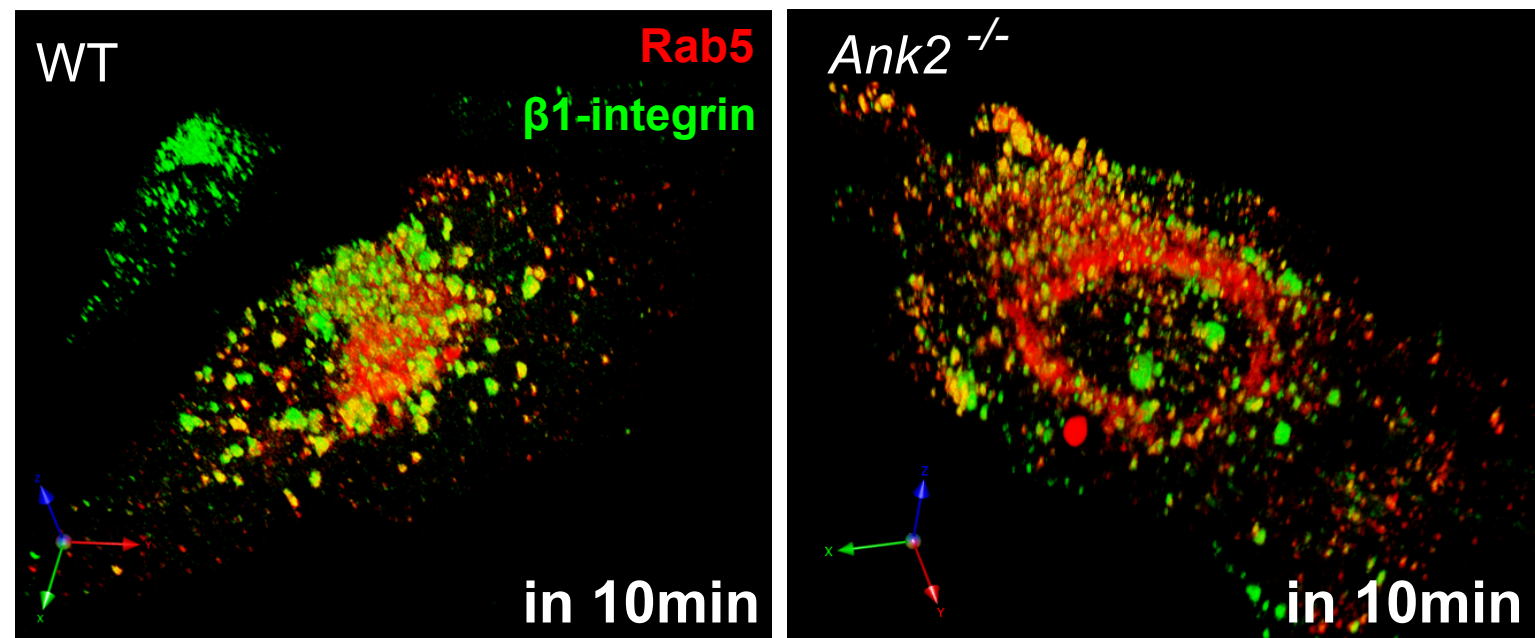

Supplement: supp [file elife-20417-supp-v1.zip]

Figure 3—figure supplement 1

A

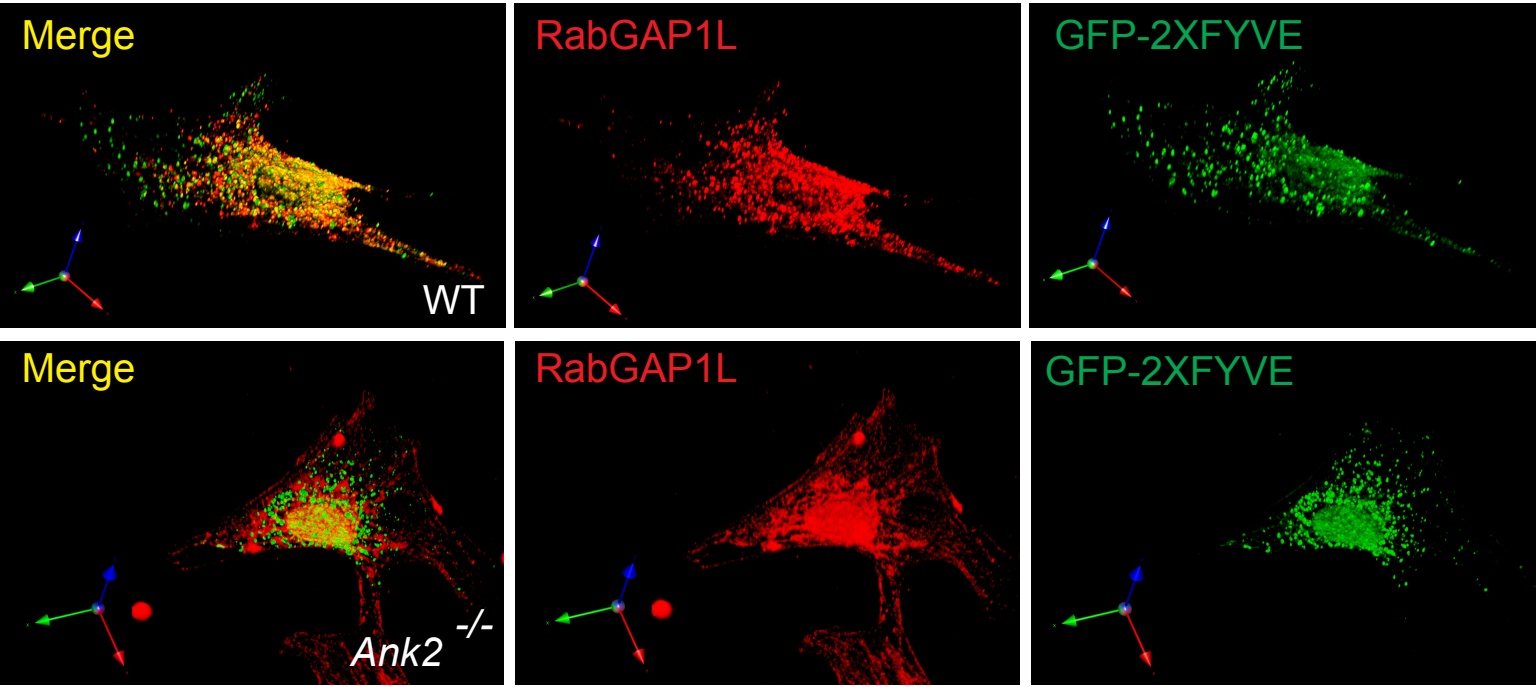

B

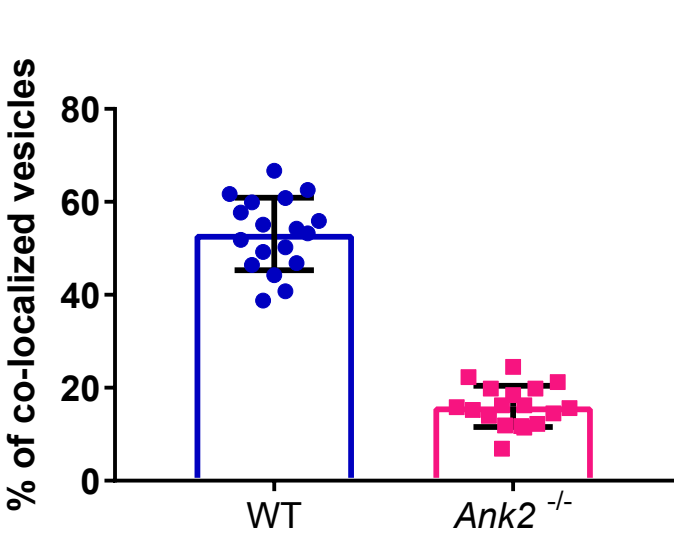

C

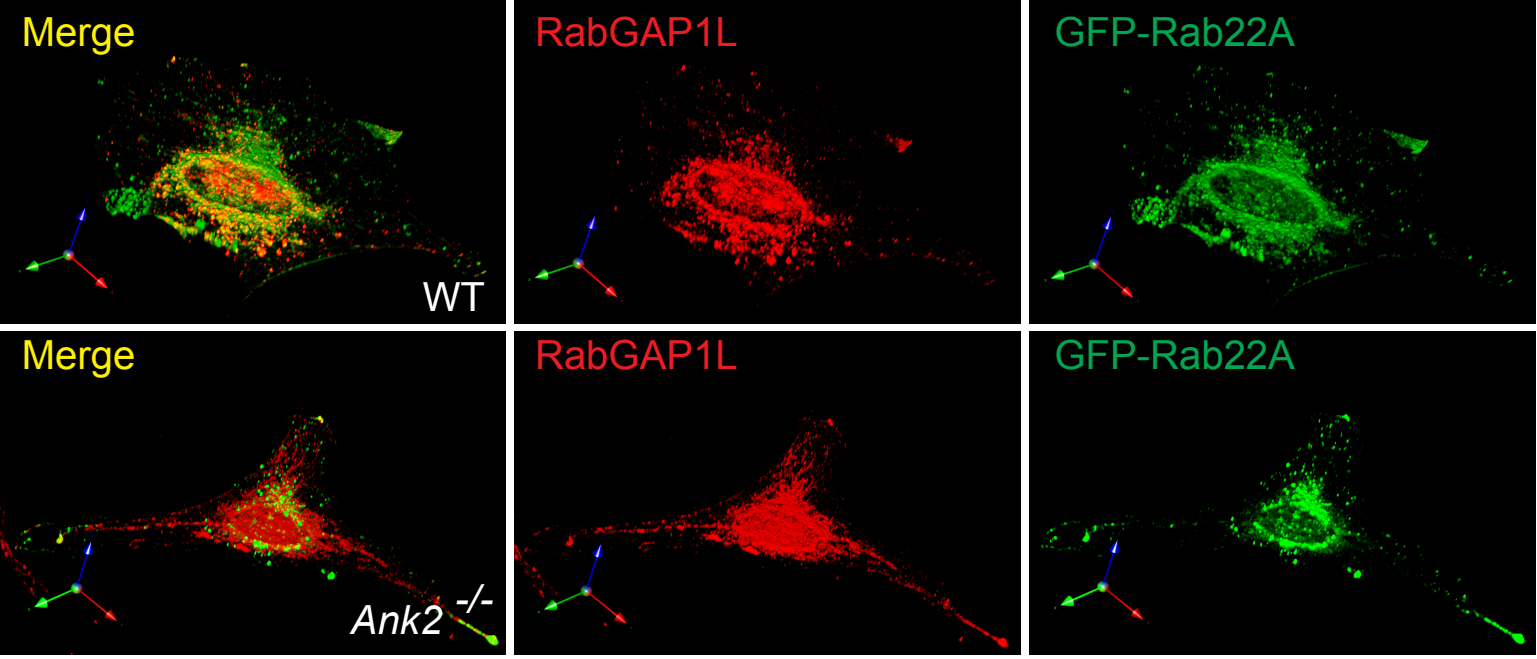

D

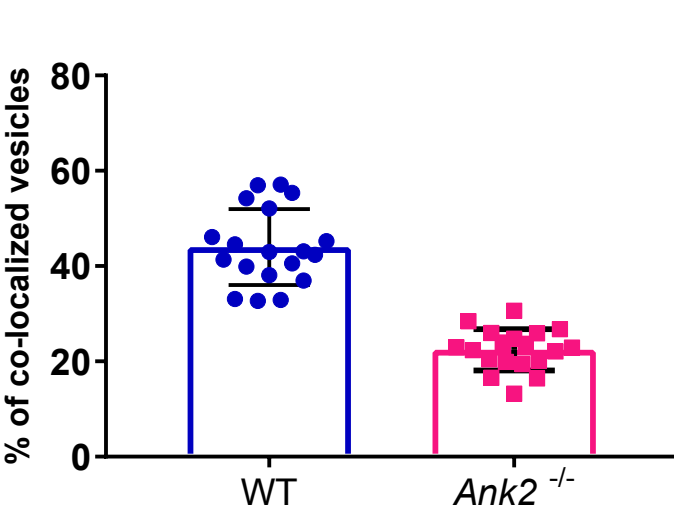

E

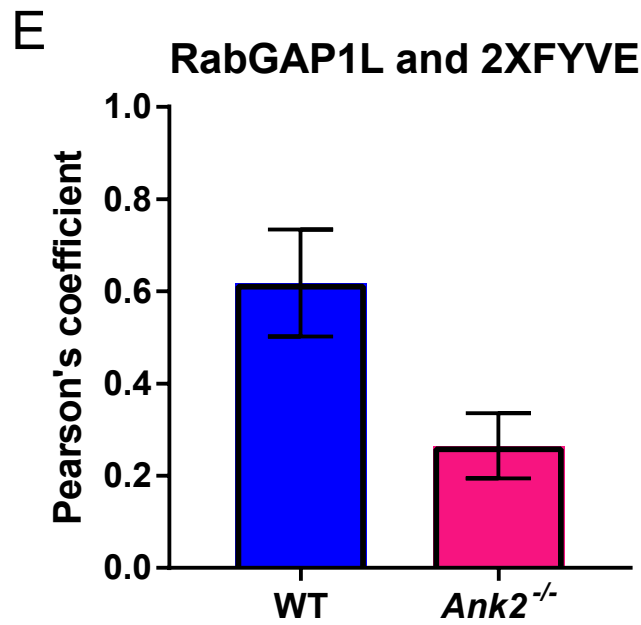

F

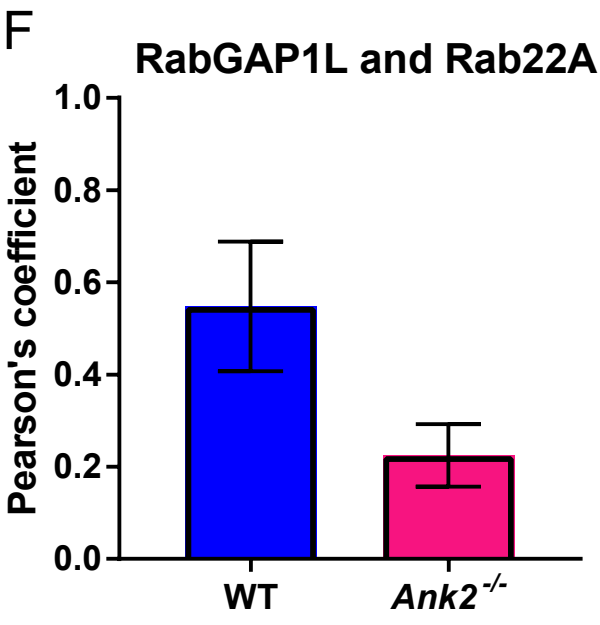

G

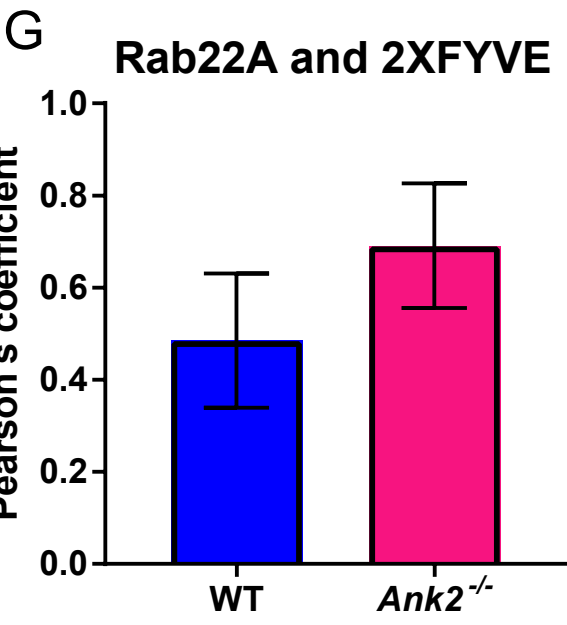

Supplement: supp [file elife-20417-supp-v1.zip]

Figure 1—figure supplement 1

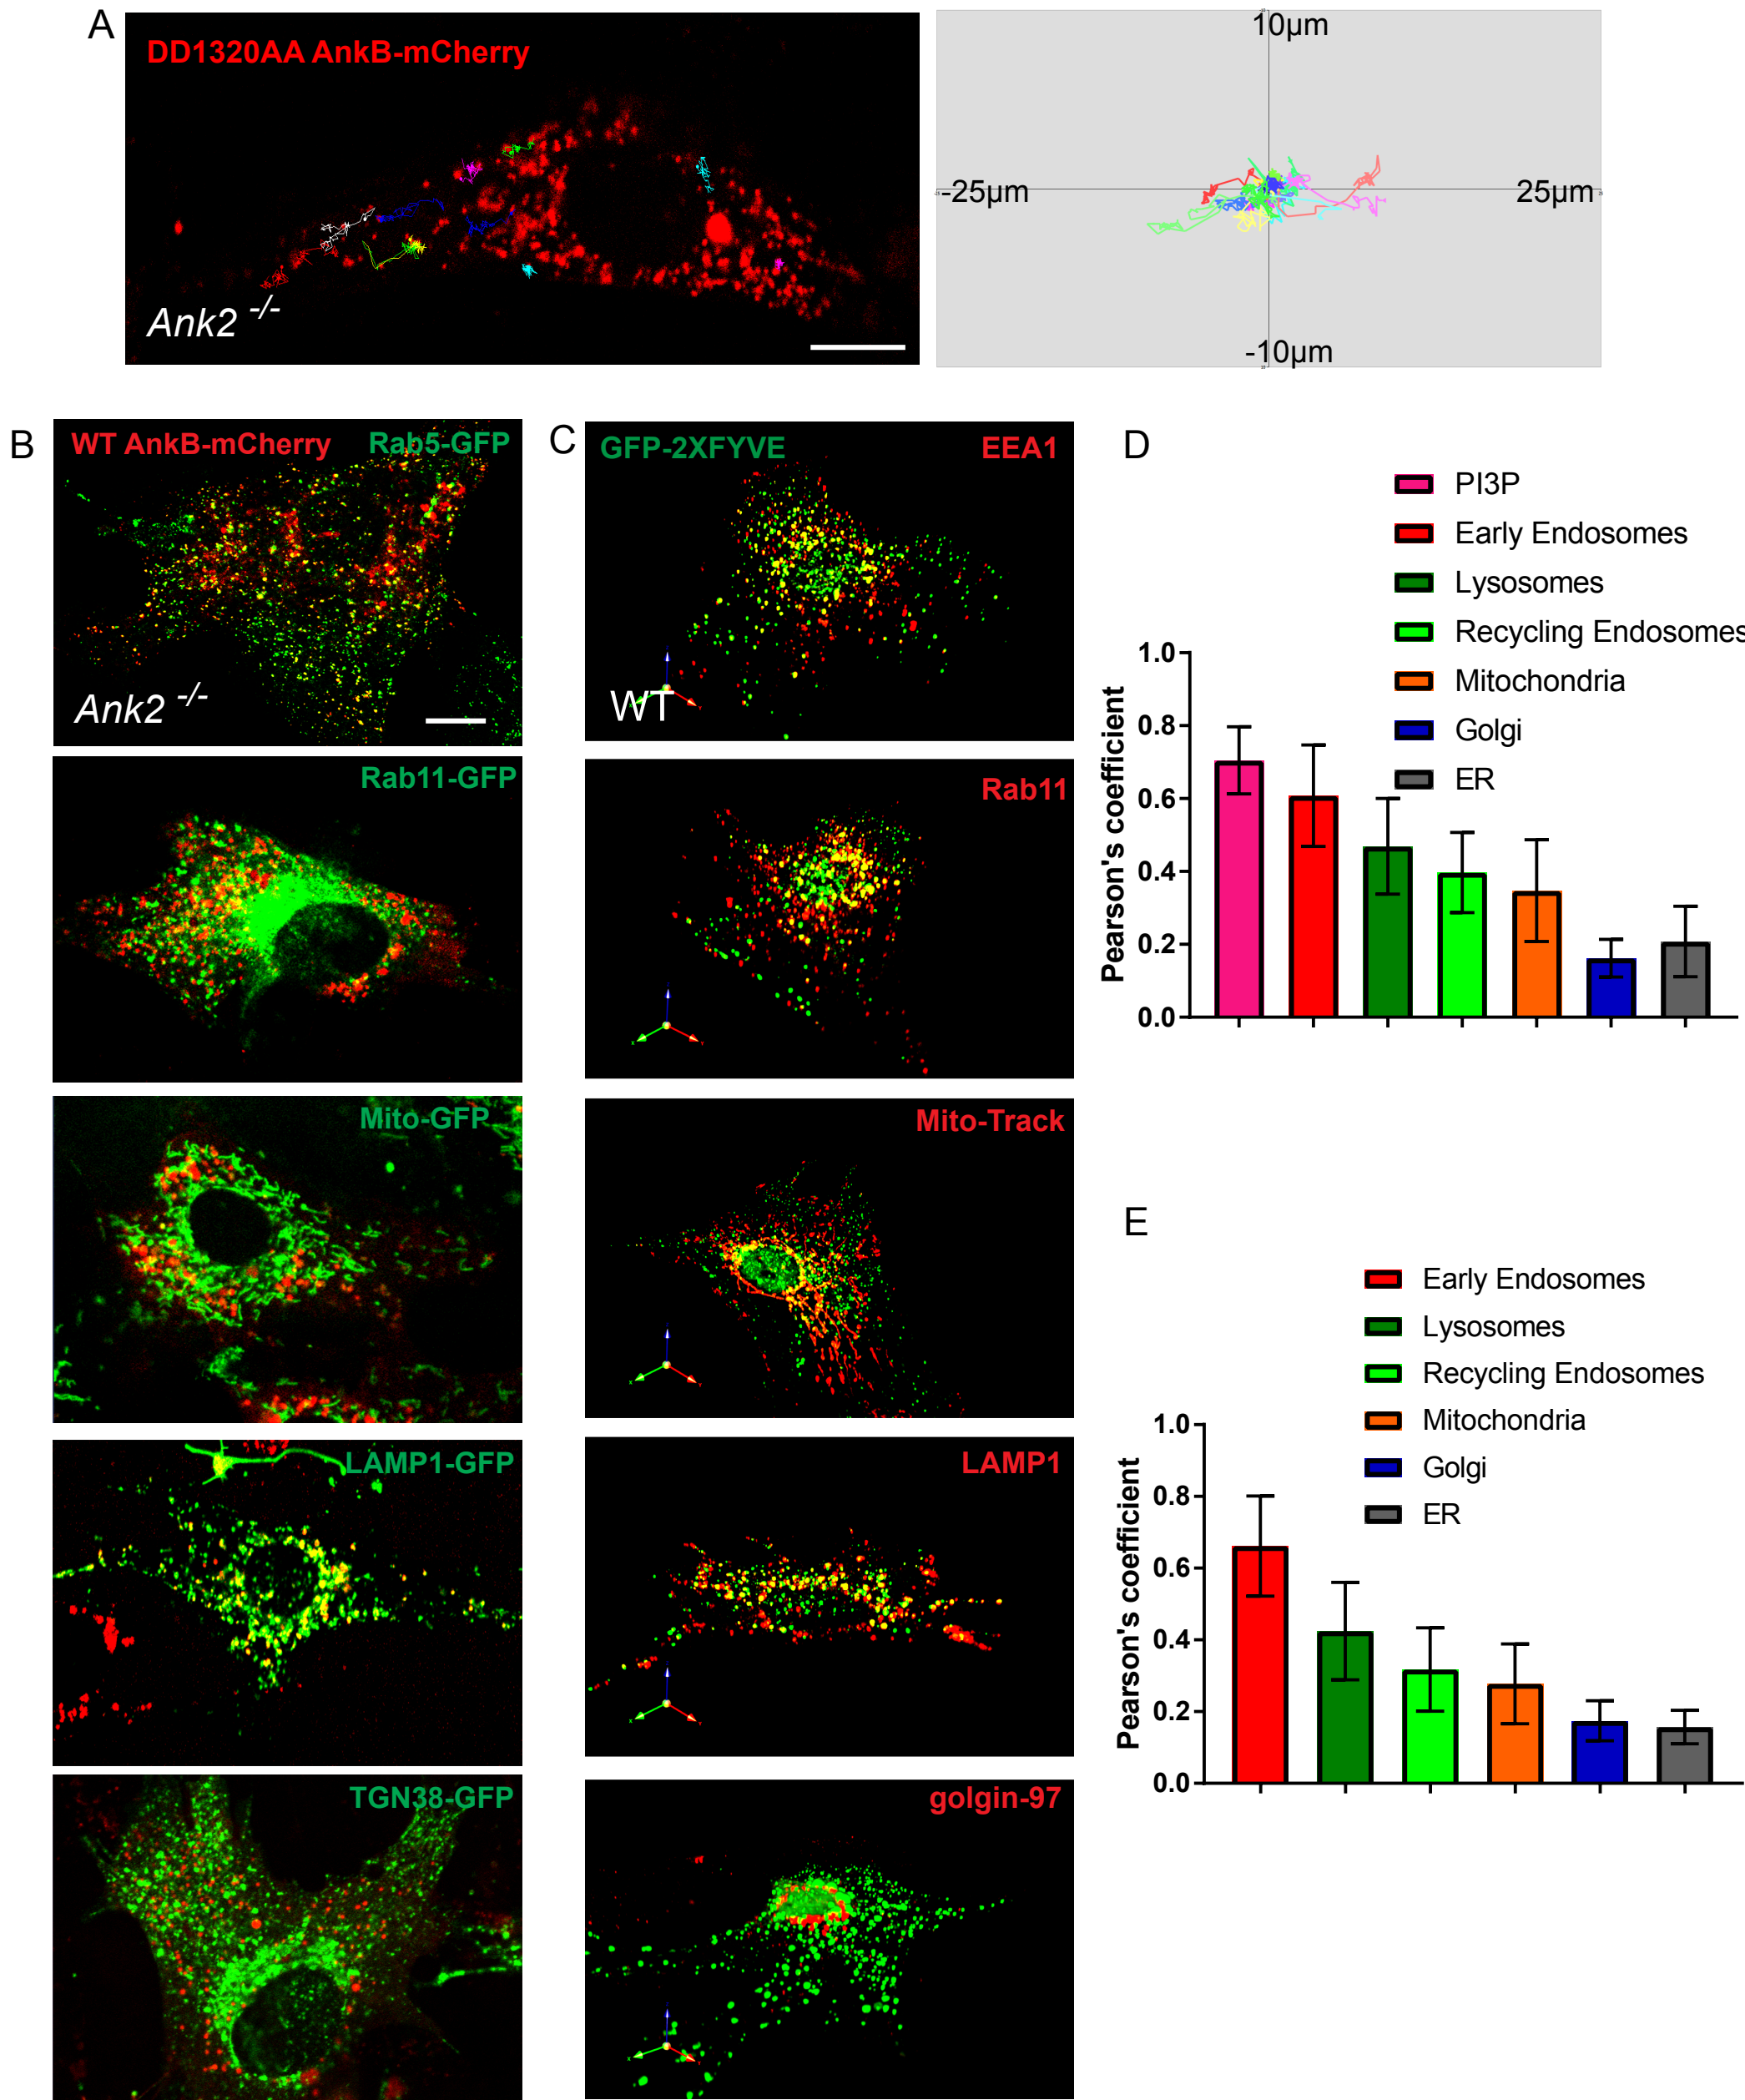

Supplement: supp [file elife-20417-supp-v1.zip]

Figure 4—figure supplement 2

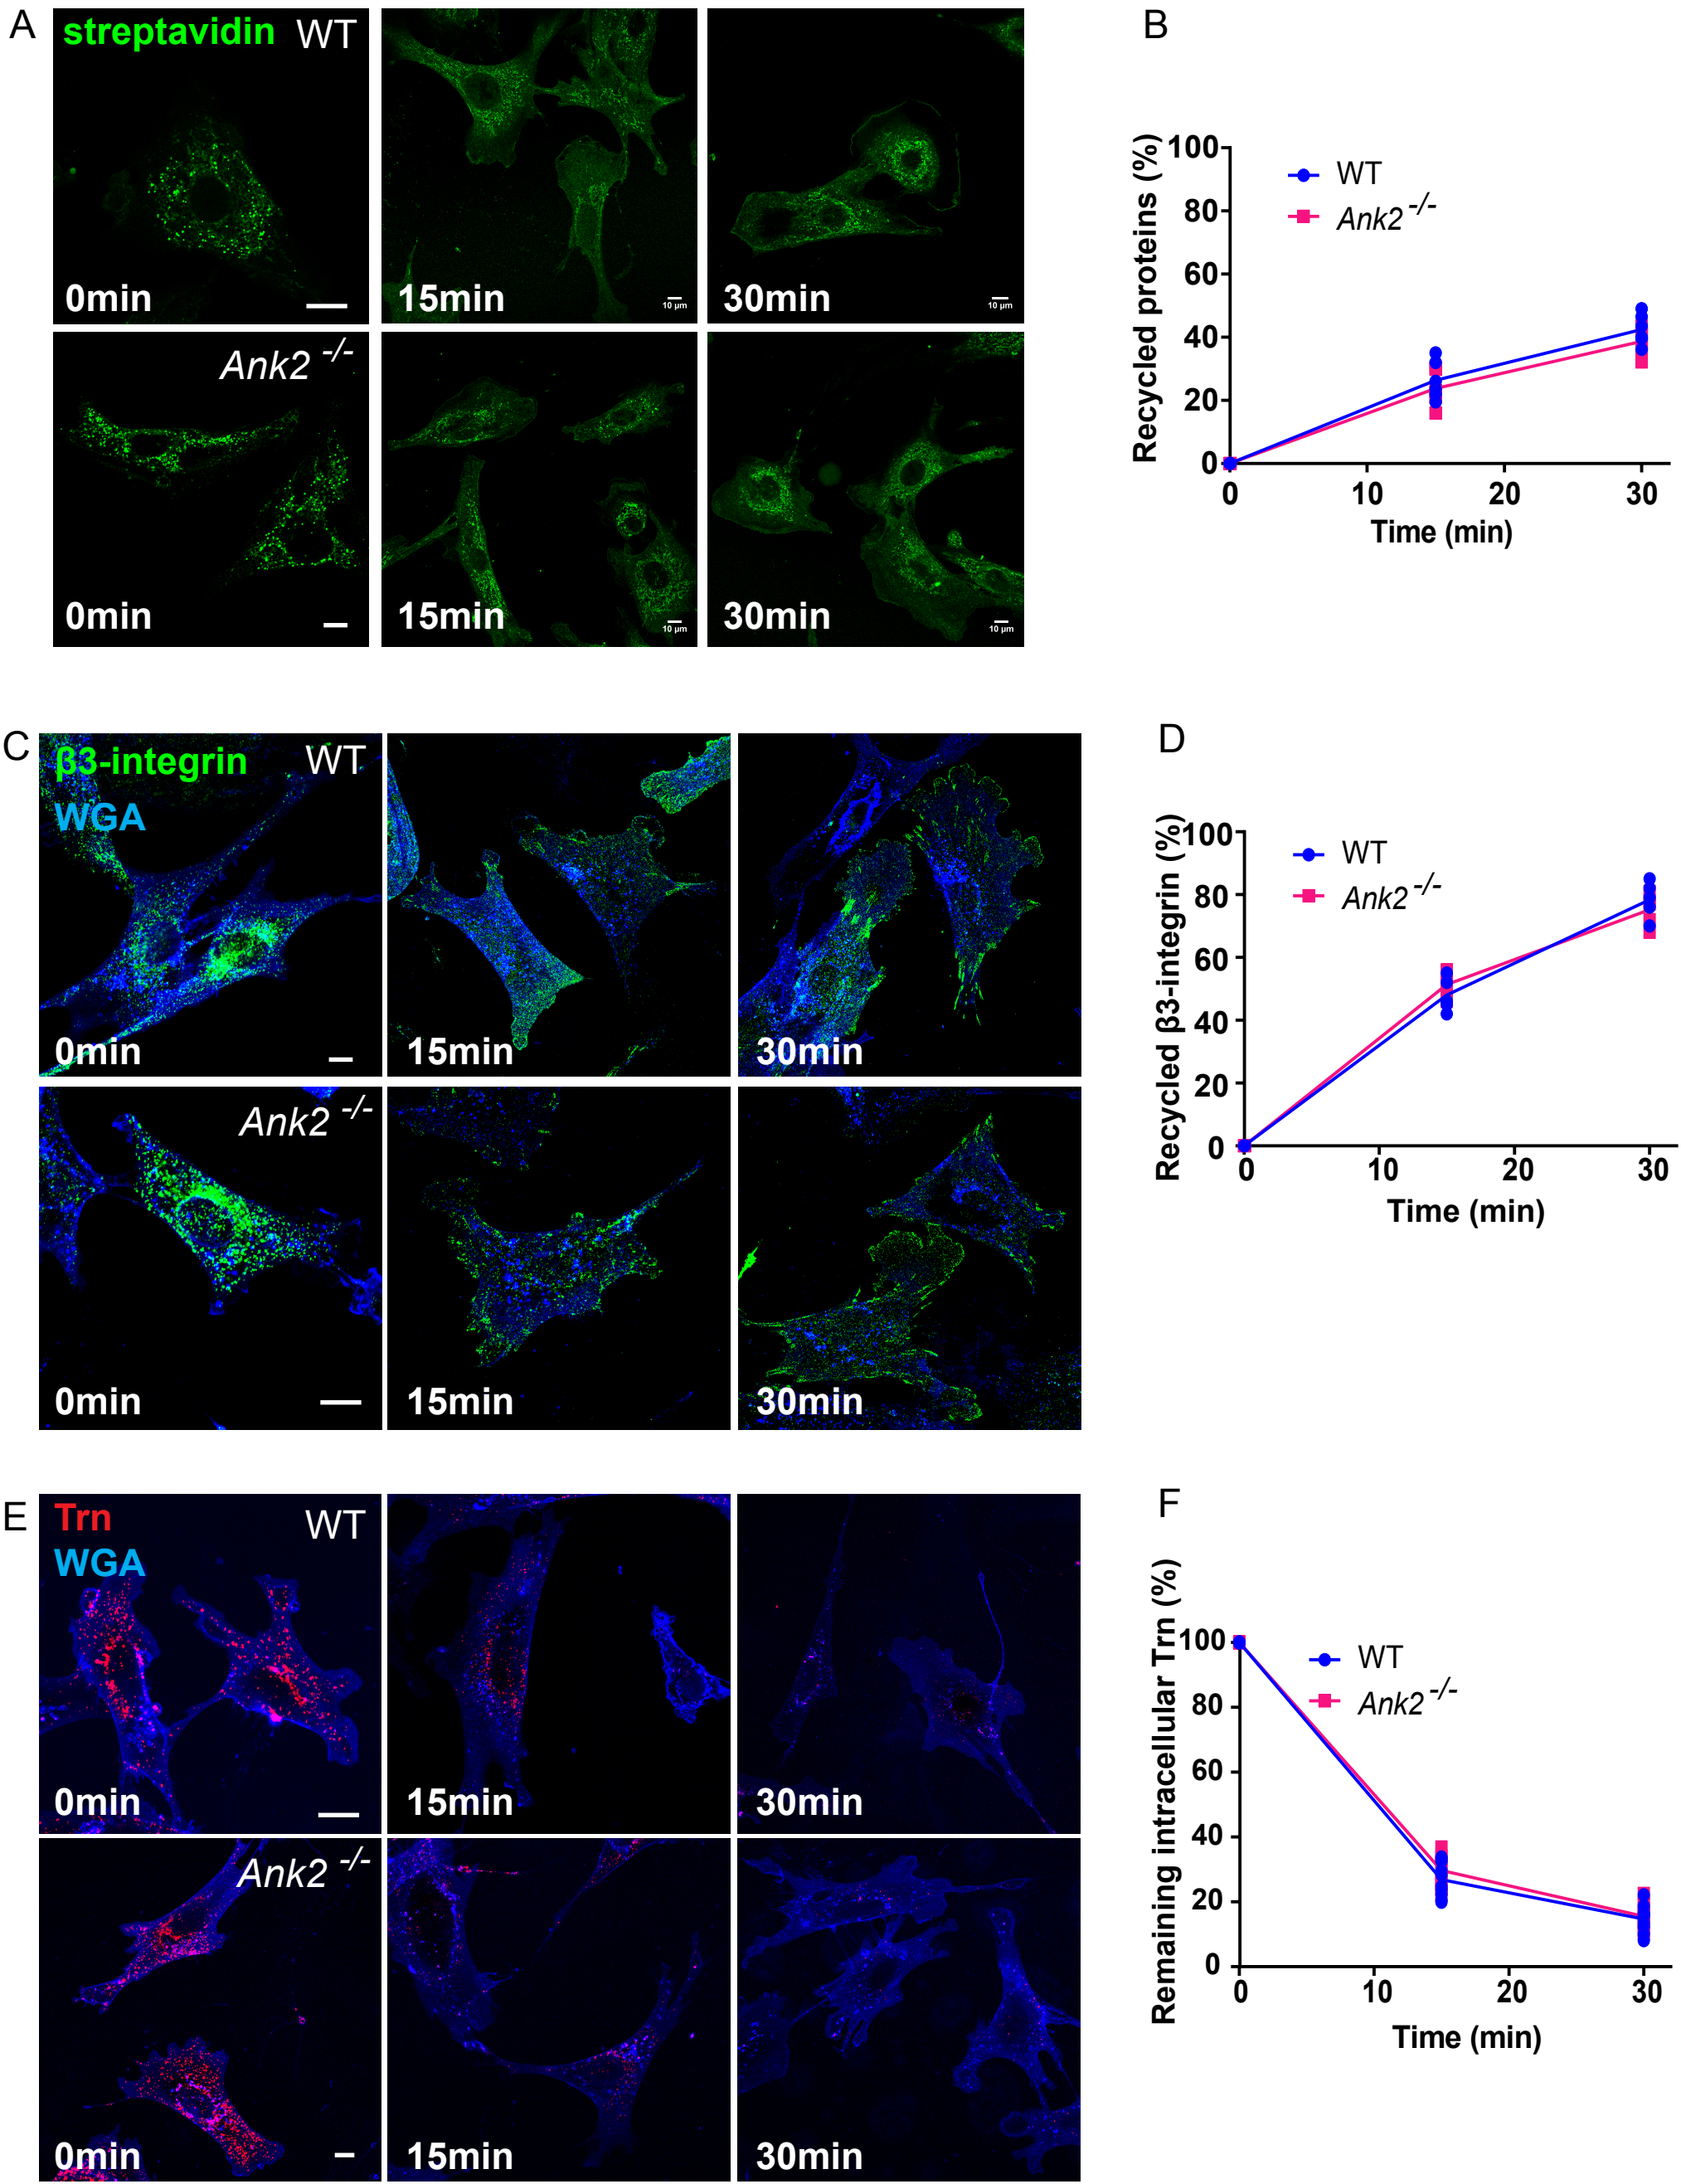

Supplement: supp [file elife-20417-supp-v1.zip › elife_poa_e20417_Figure_4_figure_supplement_2.pdf]

Figure2—figure supplement 1

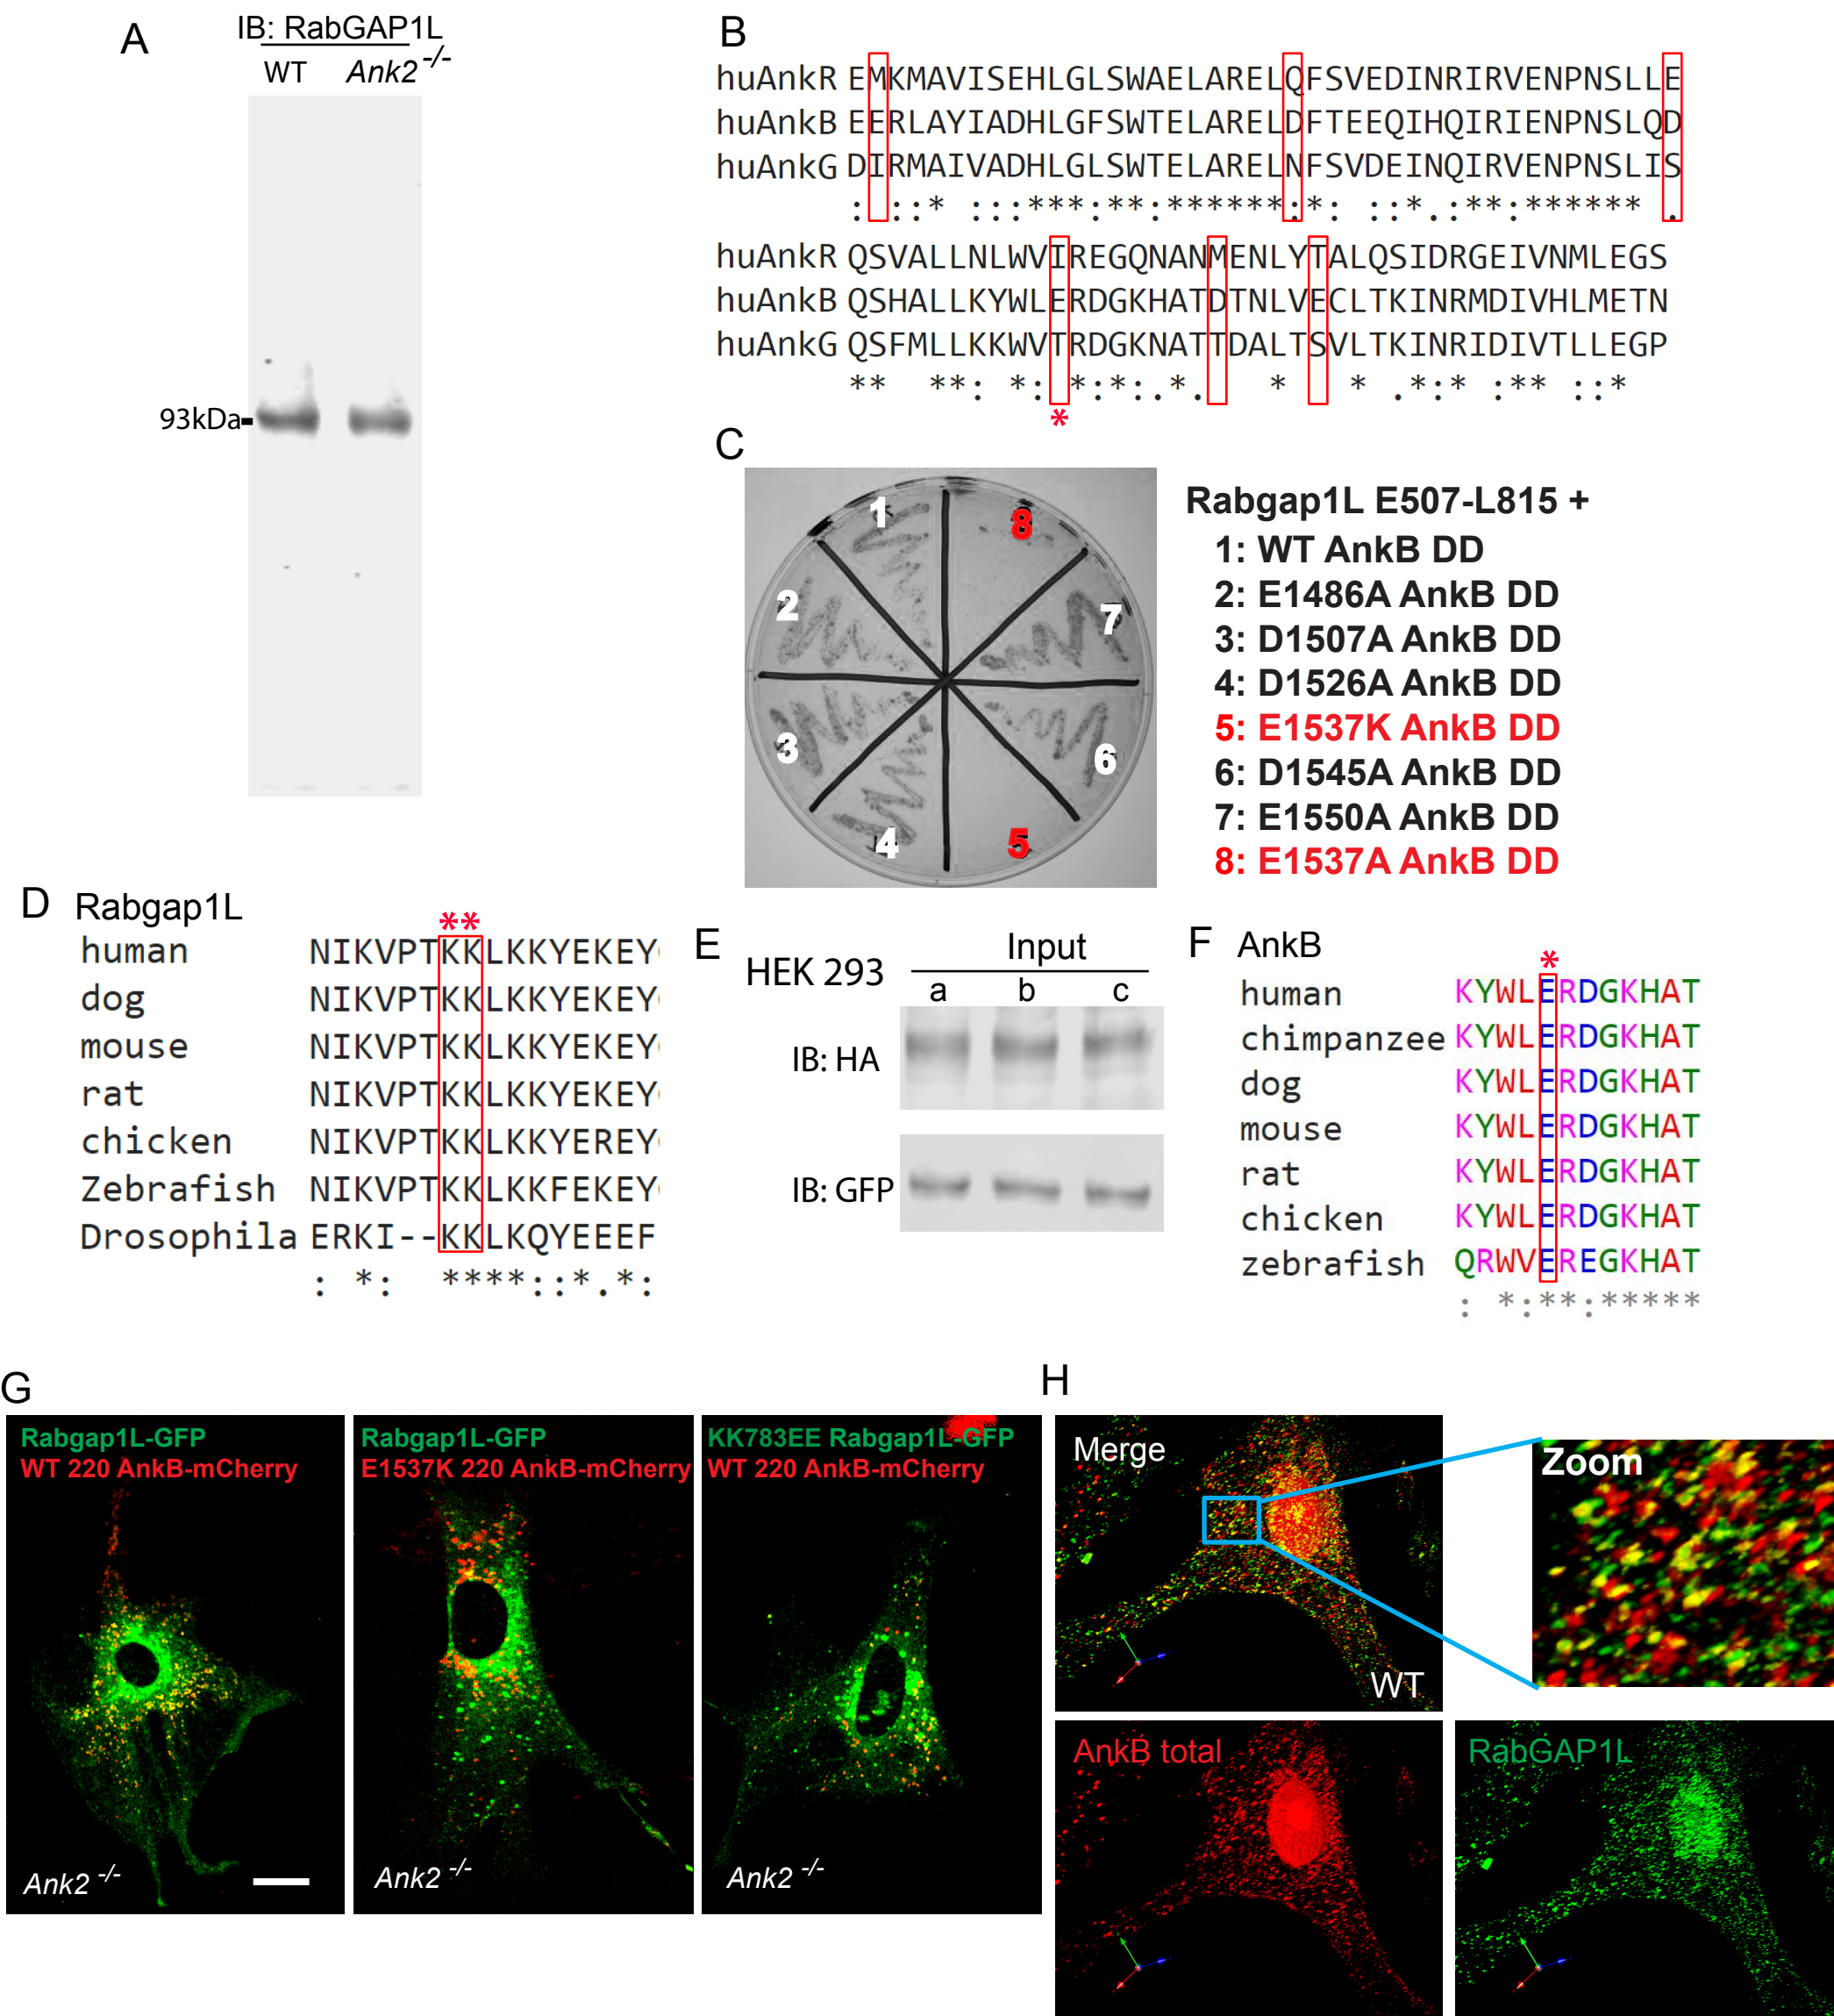

Supplement: supp [file elife-20417-supp-v1.zip › elife_poa_e20417_Figure_2_figure_supplement_1.pdf]

Figure 5—figure supplement 1

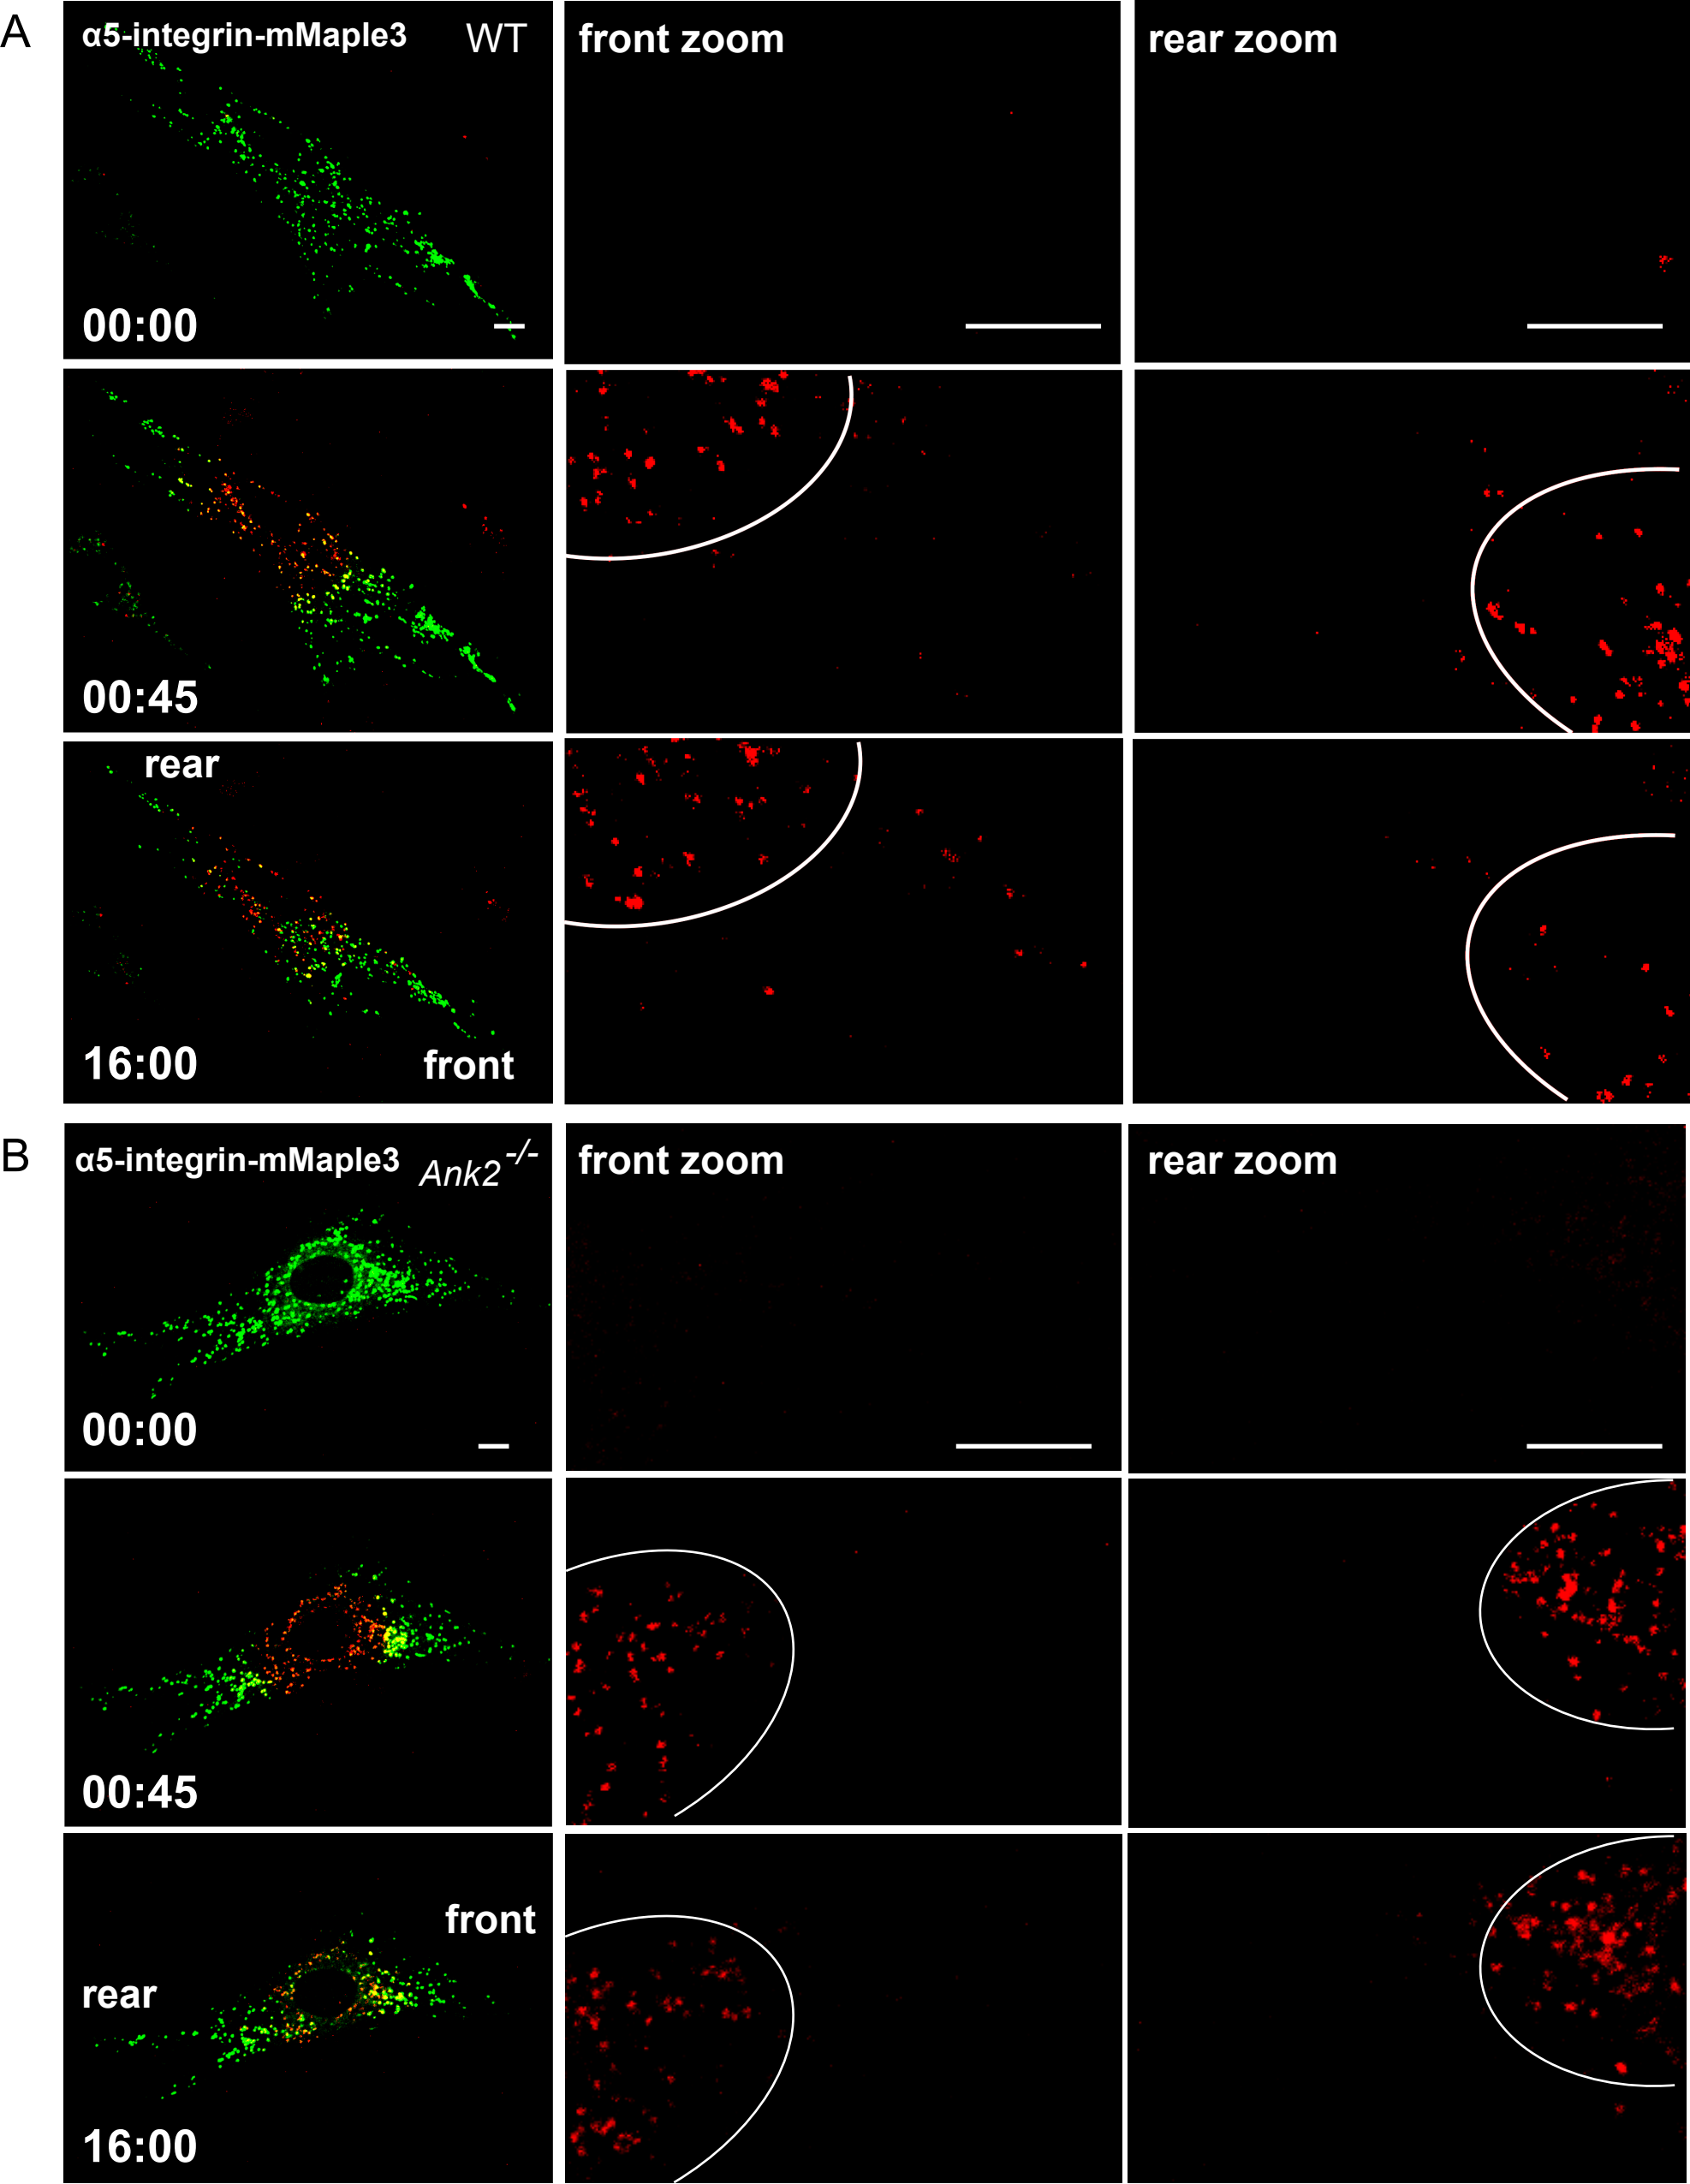

Supplement: supp [file elife-20417-supp-v1.zip › elife_poa_e20417_Figure_5_figure_supplement_1.pdf]

Figure 6—figure supplement 3

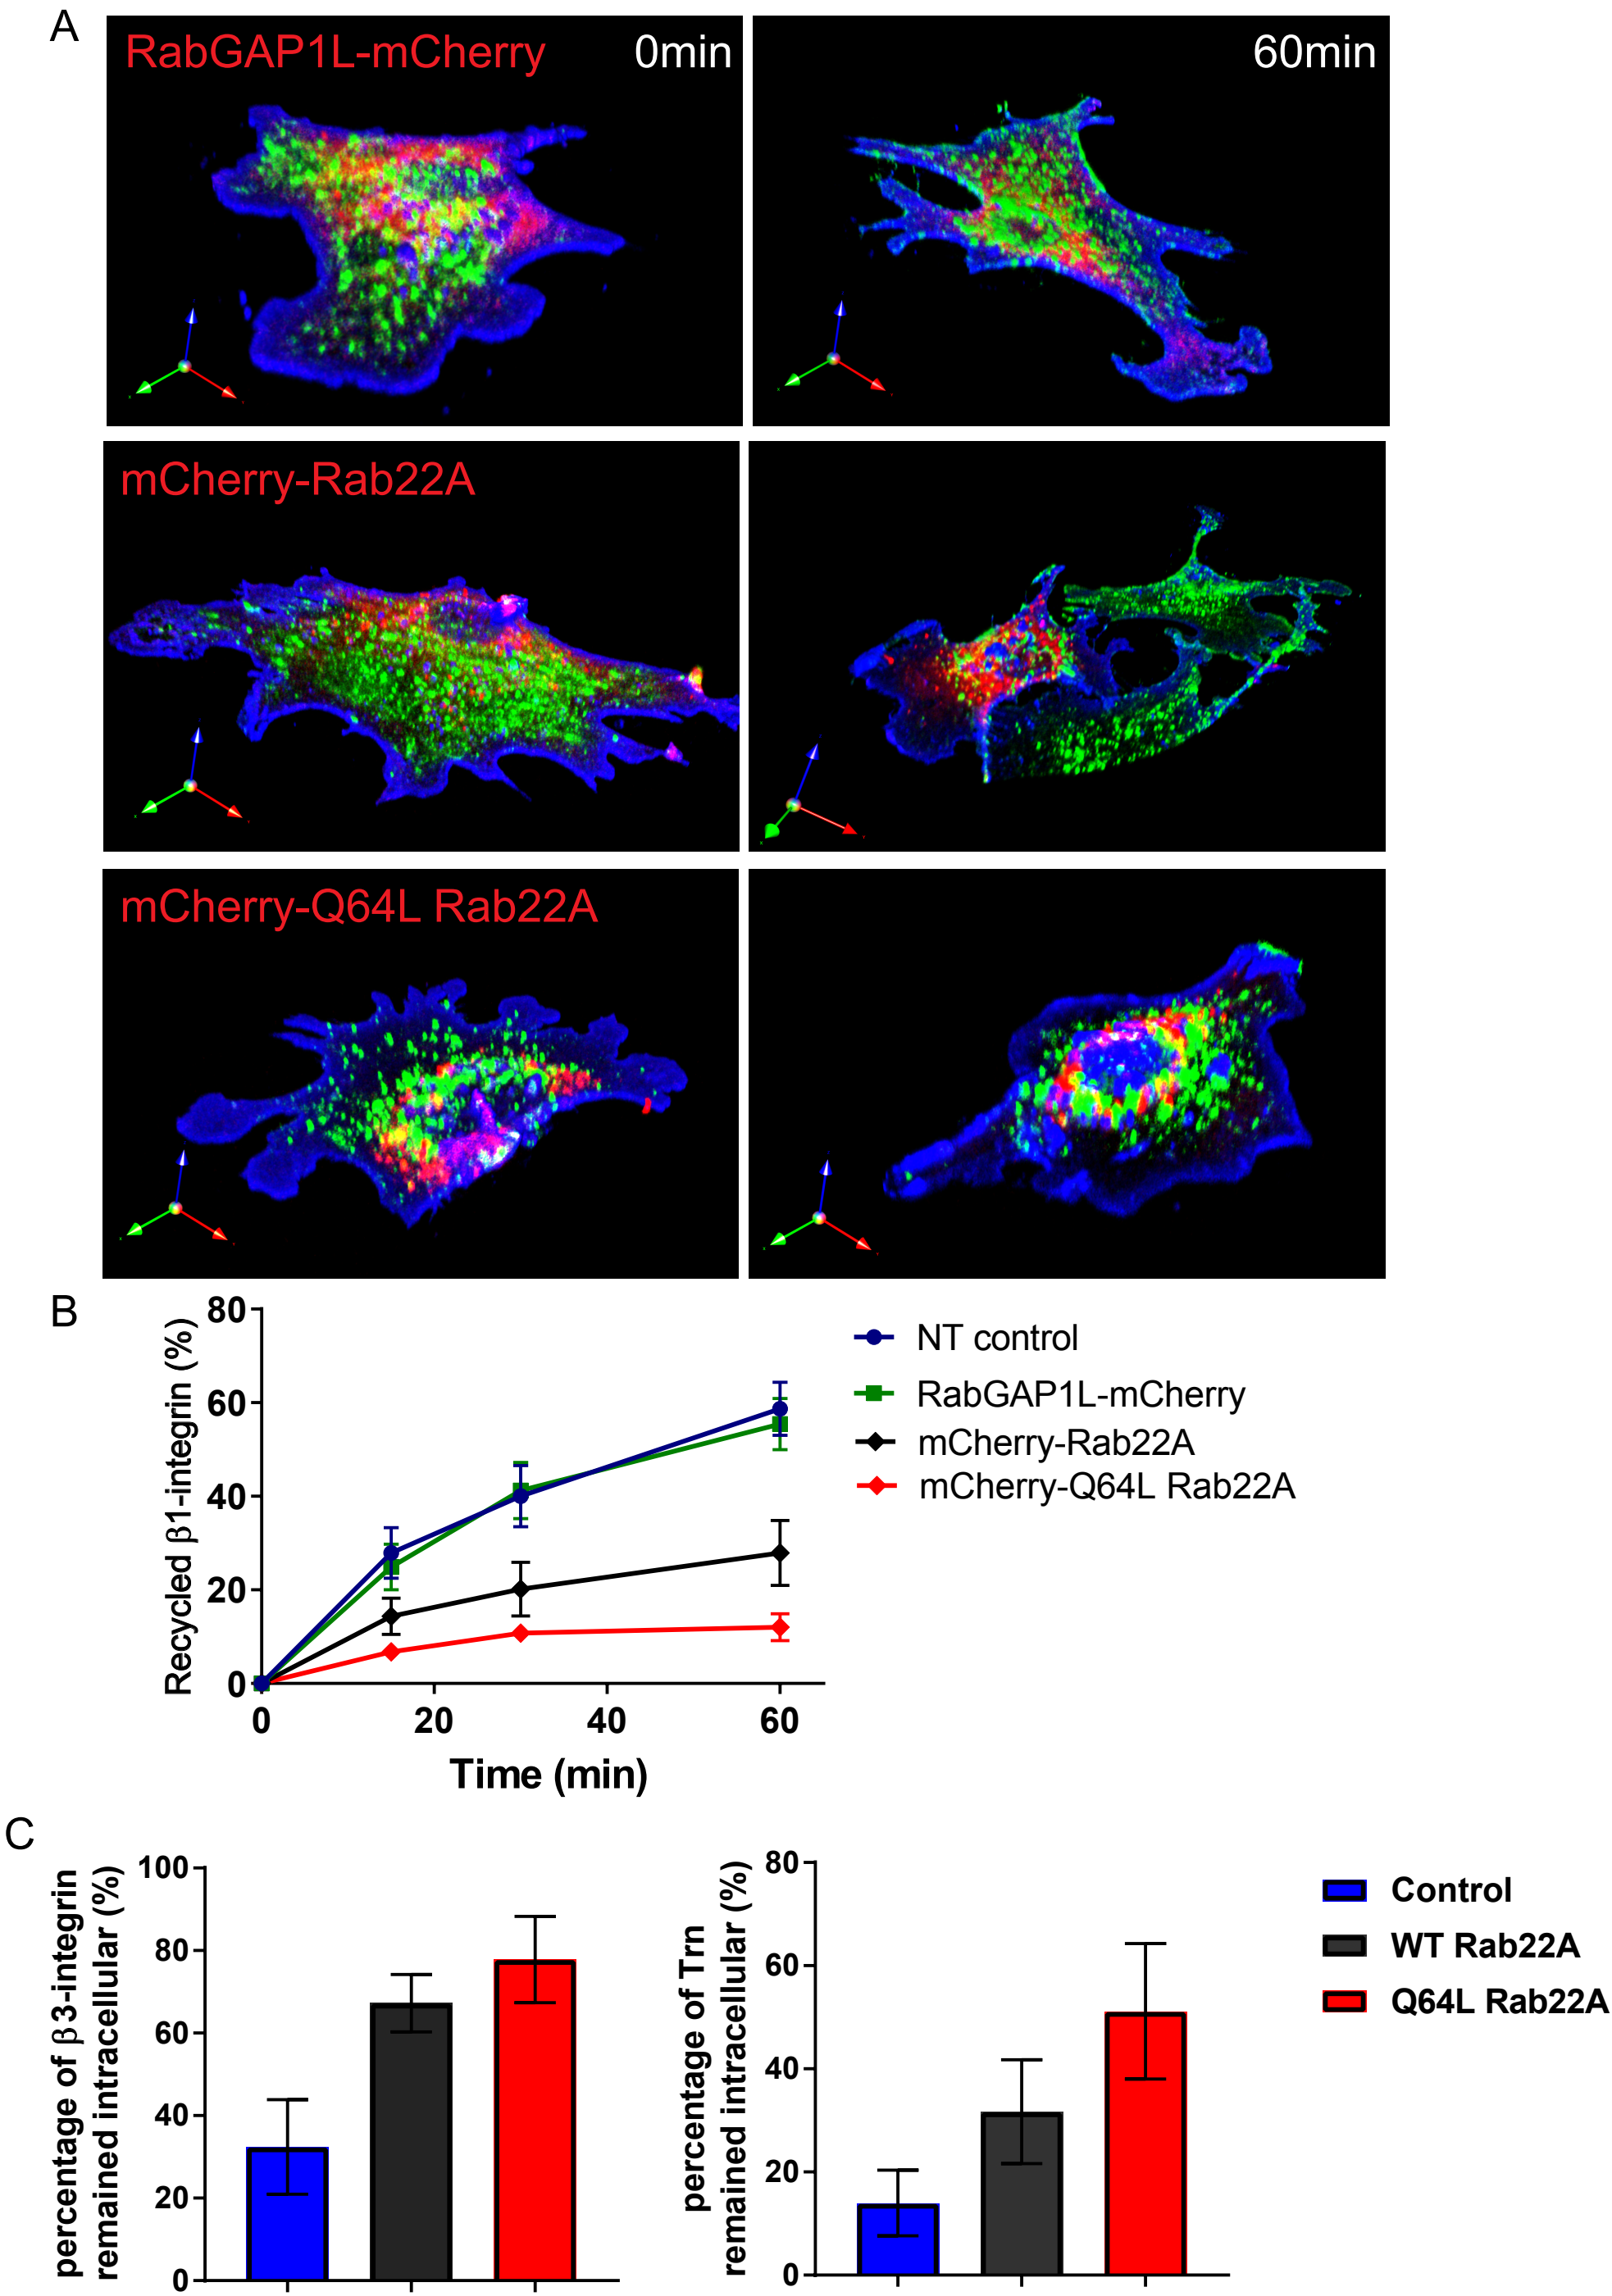

Supplement: supp [file elife-20417-supp-v1.zip › elife_poa_e20417_Figure_6_figure_supplement_3.pdf]

Figure 8—figure supplement 1

A

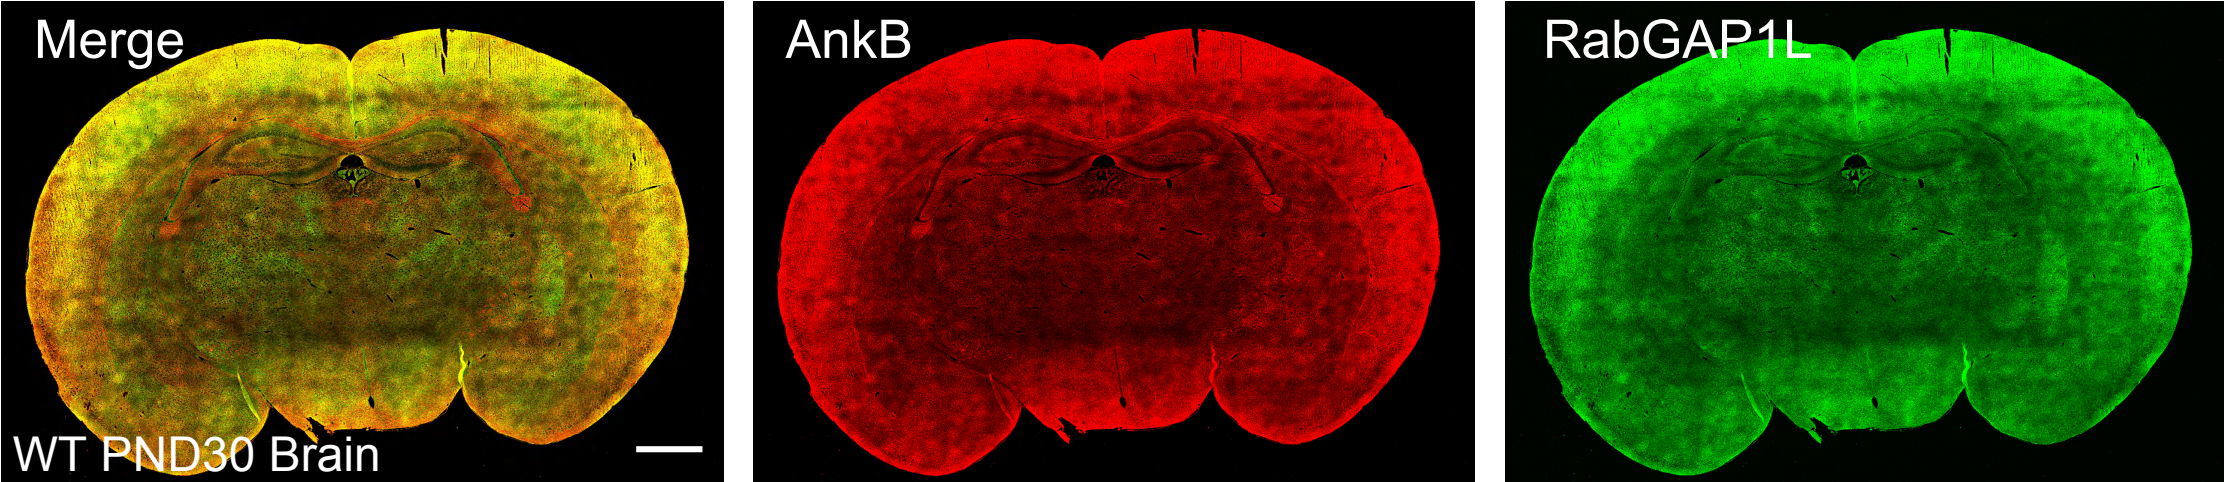

B

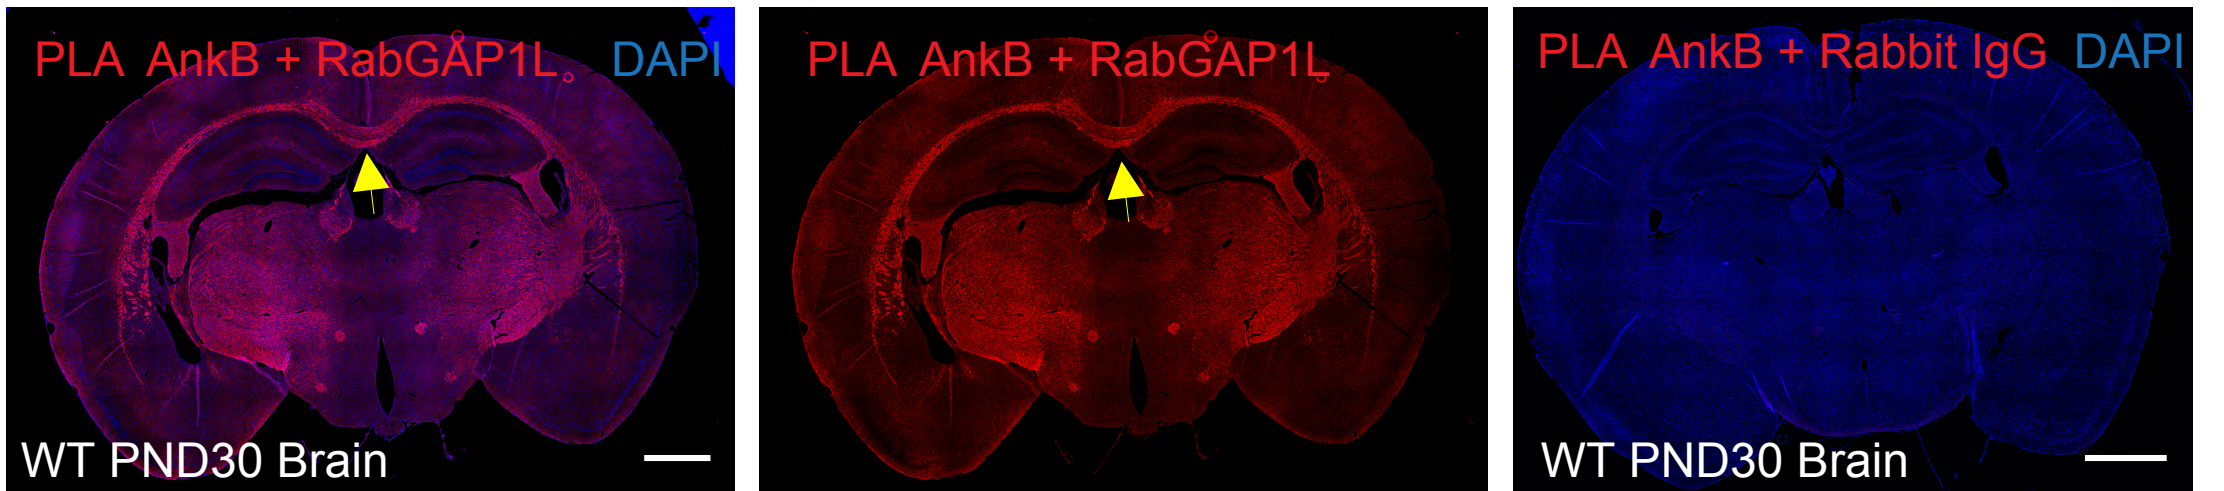

C

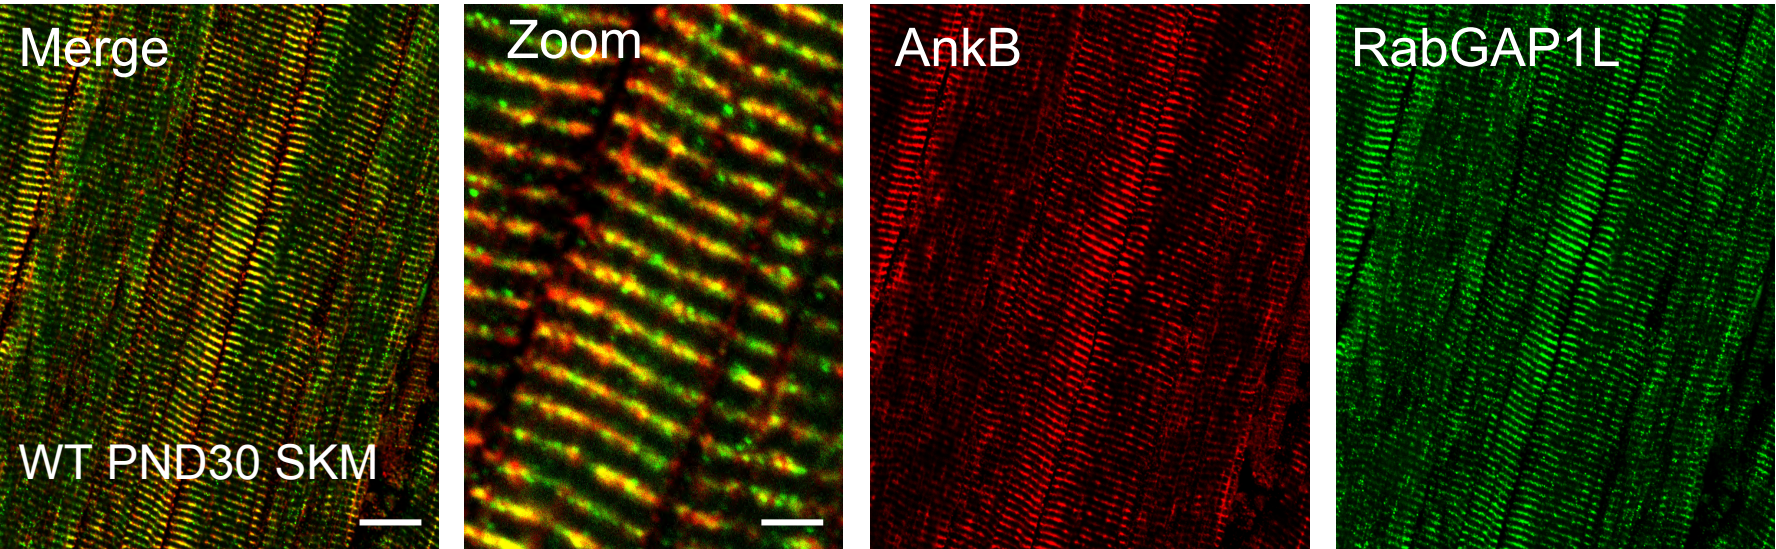

D

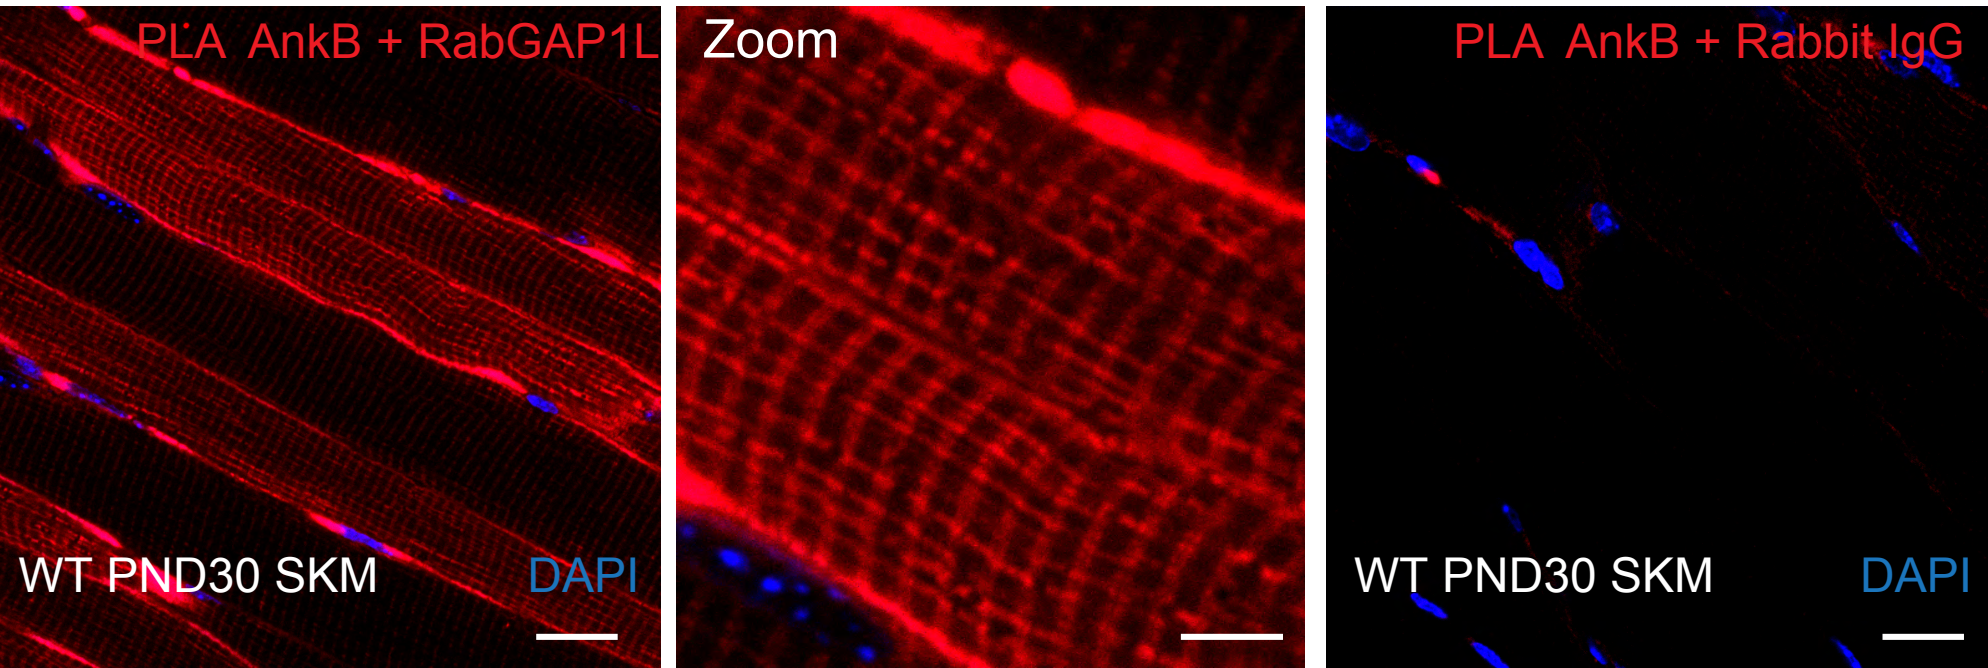

Supplement: supp [file elife-20417-supp-v1.zip › elife_poa_e20417_Figure_8_figure_supplement_1.pdf]

Figure 6—figure supplement 2

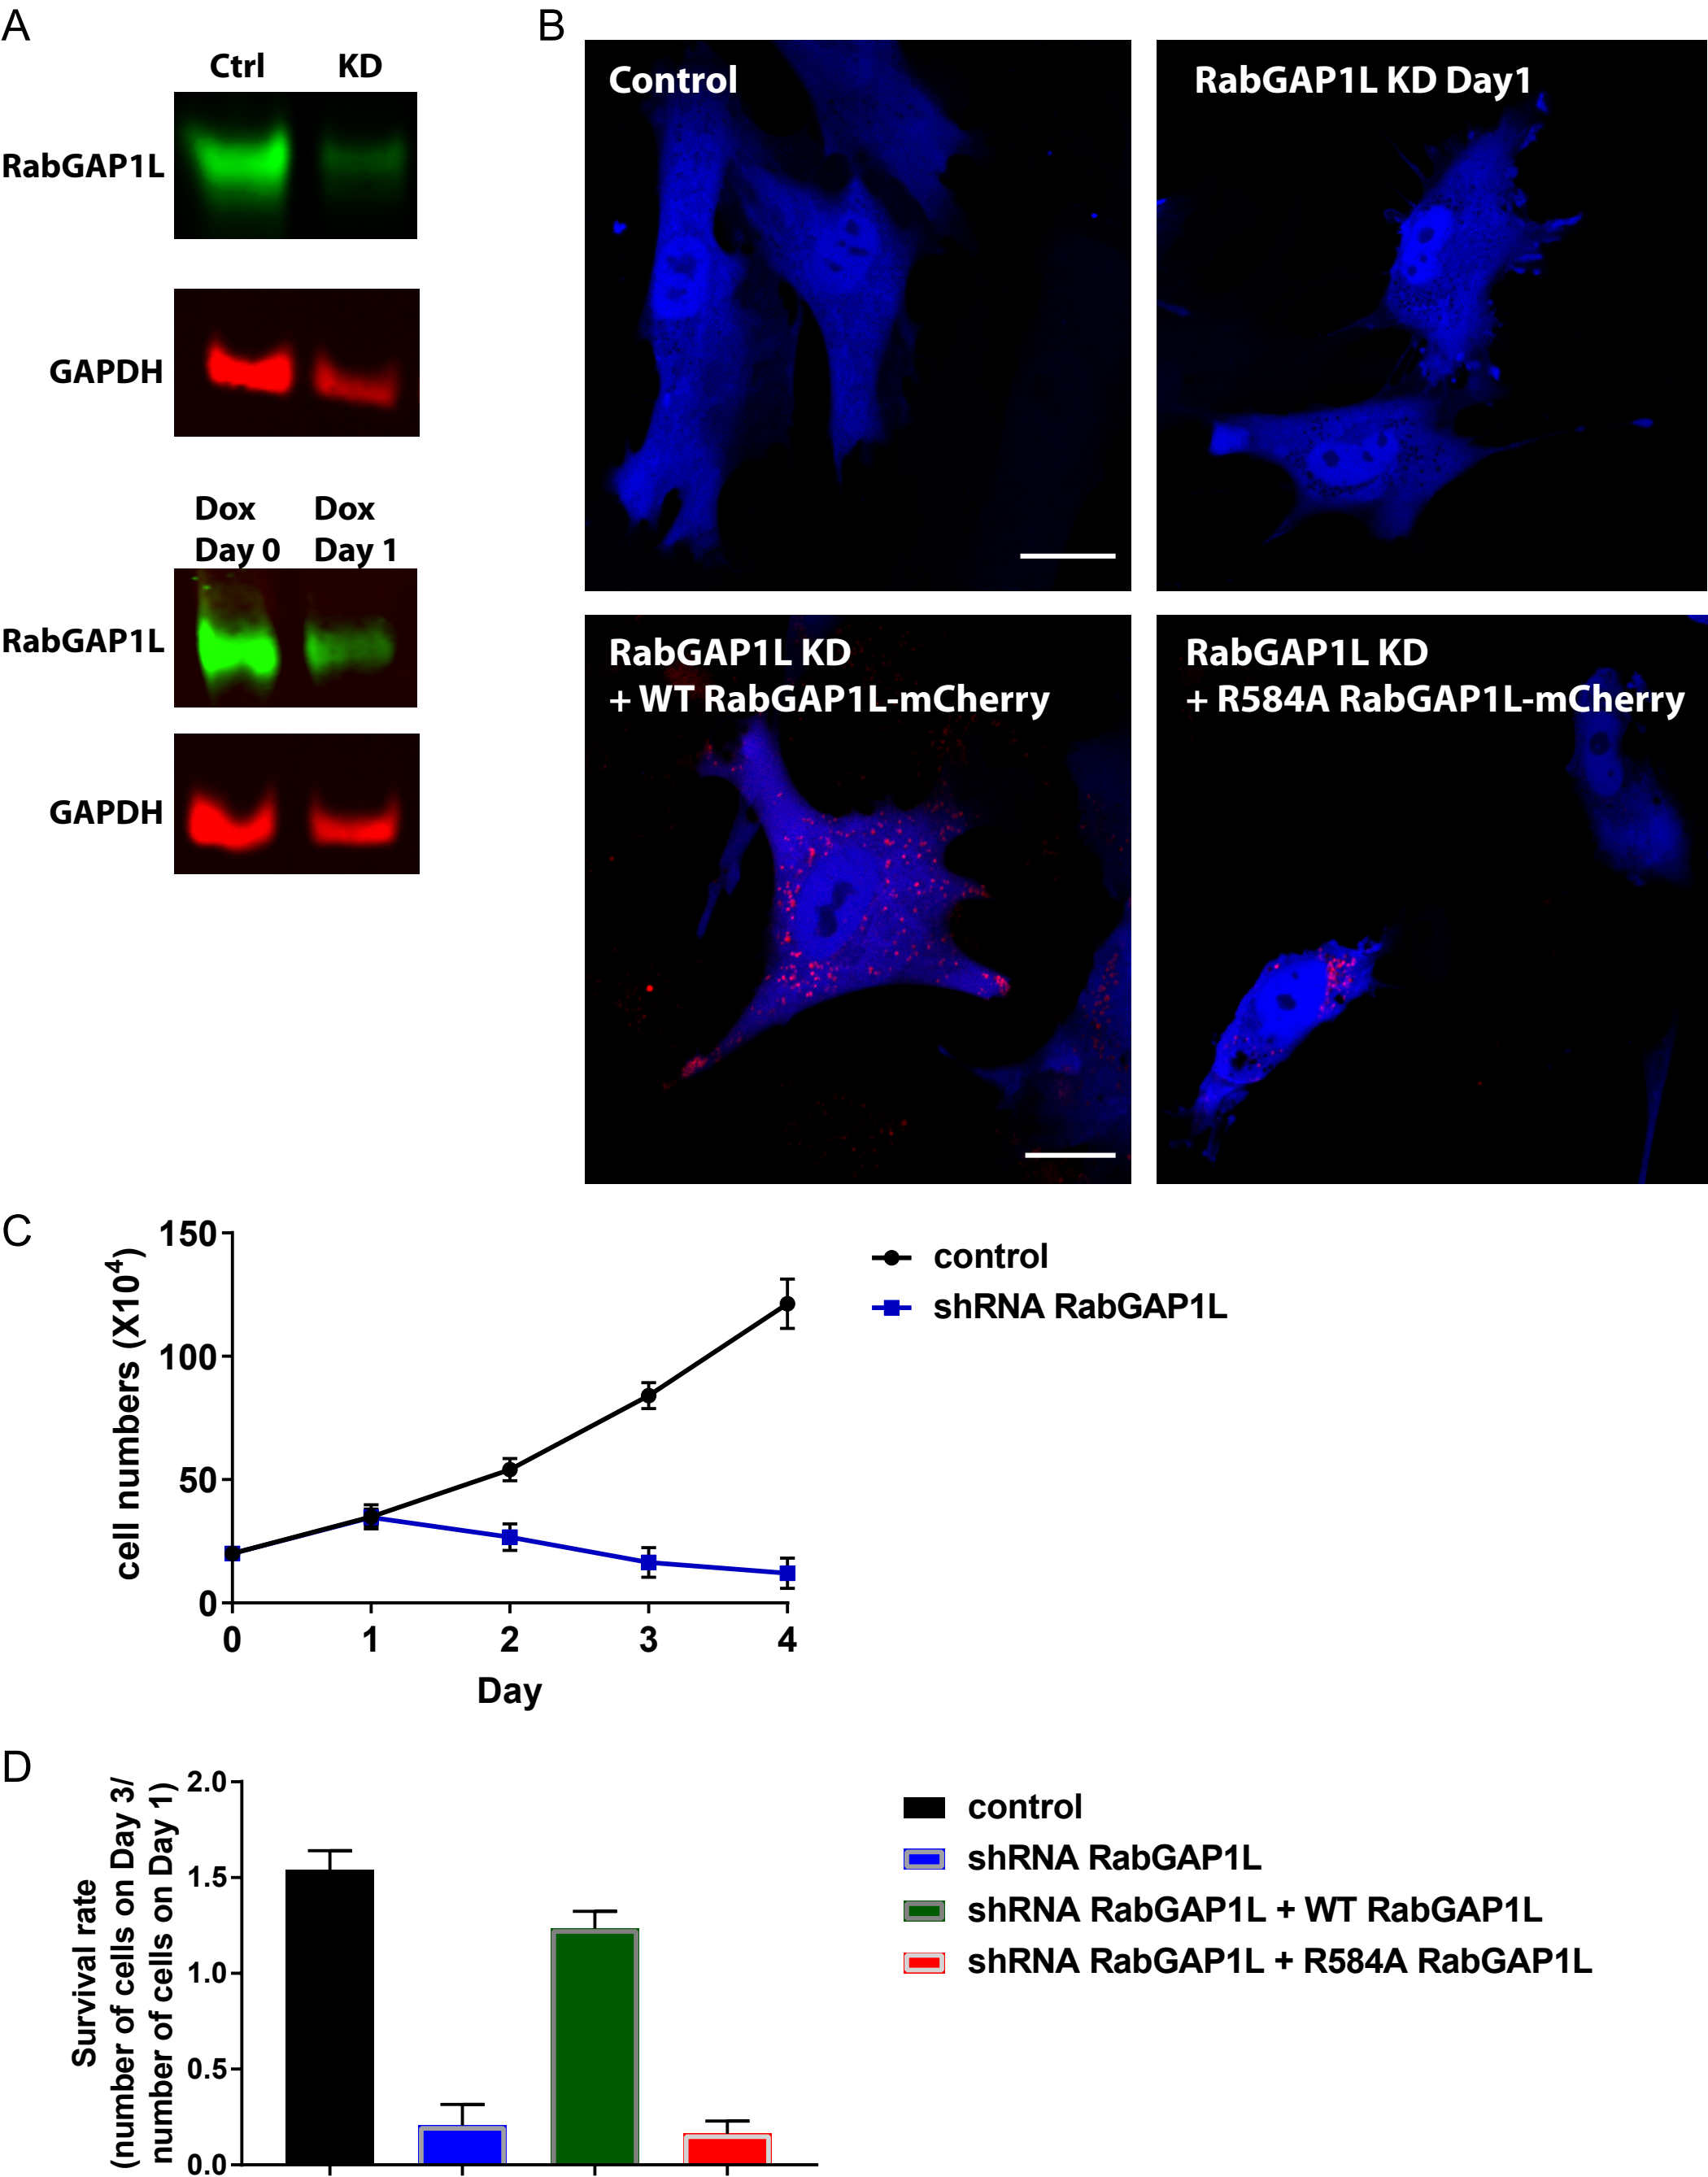

Supplement: supp [file elife-20417-supp-v1.zip › elife_poa_e20417_Figure_6_figure_supplement_2.pdf]
